# Supplementary material for: The C. difficile clnRAB operon initiates adaptations to the host environment in response to LL-37
Source: PubMed Central journal article supplement (PMC6117091; doi:10.1371/journal.ppat.1007153), 2018-08-20
Supplement: ppat.1007153.s012.pdf [file ppat.1007153.s012.pdf]

**Table S1. Genes differentially expressed in LL-37**

| Gene <sup>a</sup>          | Fold change in LL-37 <sup>b</sup> | Product                                                                    | COG <sup>c</sup> | p <sup>d</sup> |
|----------------------------|-----------------------------------|----------------------------------------------------------------------------|------------------|----------------|
| <b>Induced in LL-37</b>    |                                   |                                                                            |                  |                |
| <i>CD630_16180 (clnA)</i>  | 202.99                            | ABC-type transport system multidrug-family ATP-binding protein             | V                | 0.023          |
| <i>CD630_16190 (clnB)</i>  | 192.16                            | ABC-type transport system multidrug-family permease                        | -                | 0.001          |
| <i>CD630_16170 (clnR)</i>  | 186.82                            | Transcriptional regulator GntR family                                      | K                | 0.005          |
| <i>CD630_16100</i>         | 64.45                             | conserved hypothetical protein                                             | -                | 4.2E-04        |
| <i>CD630_16110</i>         | 34.77                             | conserved hypothetical protein                                             | -                | 0.028          |
| <i>CD630_16090</i>         | 30.62                             | conserved hypothetical protein                                             | -                | 0.030          |
| <i>CD630_16070</i>         | 30.25                             | ABC-type transport system multidrug-family ATP-binding protein             | V                | 0.011          |
| <i>CD630_12400 (vanZ)</i>  | 28.43                             | Teicoplanin resistance protein                                             | V                | 0.009          |
| <i>CD630_23410 (abfD)</i>  | 14.81                             | Gamma-aminobutyrate metabolism dehydratase/isomerase                       | Q                | 0.005          |
| <i>CD630_23820</i>         | 13.76                             | putative pyridoxal phosphate-dependent transferase                         | E                | 0.051          |
| <i>CD630_23810 (iorA)</i>  | 13.66                             | Indole pyruvate ferredoxin/flavodoxin oxidoreductase                       | C                | 0.007          |
| <i>CD630_23390 (cat2)</i>  | 13.27                             | 4-hydroxybutyrate CoA transferase                                          | C                | 0.016          |
| <i>CD630_23400</i>         | 13.14                             | uncharacterised protein                                                    | -                | 0.053          |
| <i>CD630_23380 (4hbD)</i>  | 12.95                             | 4-hydroxybutyrate dehydrogenase                                            | C                | 0.012          |
| <i>CD630_23420 (sucD)</i>  | 12.71                             | Succinate-semialdehyde dehydrogenase                                       | C                | 0.009          |
| <i>CD630_23430 (cat1)</i>  | 11.85                             | Succinyl-CoA:coenzyme A transferase                                        | C                | 0.007          |
| <i>CD630_23440</i>         | 10.85                             | putative membrane protein (butyrate conversion)                            | R                | 0.005          |
| <i>CD630_23800 (iorB)</i>  | 10.81                             | Indole pyruvate ferredoxin/flavodoxin oxidoreductase                       | C                | 0.010          |
| <i>CD630_12382</i>         | 5.60                              | Fragment of conserved hypothetical protein                                 | -                | 0.005          |
| <i>CD630_05500</i>         | 5.52                              | putative membrane protein                                                  | -                | 0.053          |
| <i>CD630_18870 (csfU)</i>  | 5.34                              | Extracytoplasmic function (ECF) sigma factor                               | K                | 0.002          |
| <i>CD630_05490</i>         | 4.74                              | conserved hypothetical protein                                             | -                | 0.049          |
| <i>CD630_18890</i>         | 4.54                              | ABC-type transport system multidrug-family ATP-binding protein             | V                | 1.9E-04        |
| <i>CD630_25560</i>         | 4.24                              | PTS system fructose/mannitol-family IIB component                          | GT               | 0.019          |
| <i>CD630_16990 (ribE)</i>  | 4.23                              | Riboflavin synthase alpha subunit                                          | H                | 0.035          |
| <i>CD630_04900</i>         | 4.13                              | putative sugar-phosphate dehydrogenase                                     | ER               | 0.049          |
| <i>CD630_04980</i>         | 4.13                              | putative cell-division FtsK/SpoIIIE-family protein Tn5397 CTn3-Orf21       | D                | 0.012          |
| <i>CD630_04960</i>         | 4.13                              | putative conjugative transposon protein DUF961 family Tn5397 CTn3-Orf23    | -                | 0.039          |
| <i>CD630_33740</i>         | 3.92                              | putative conjugative transposon protein Tn916-like CTn7-Orf8               | -                | 0.011          |
| <i>CD630_04970</i>         | 3.86                              | putative conjugative transposon protein DUF961 family Tn5397 CTn3-Orf22    | -                | 0.008          |
| <i>CD630_18880 (rsiU)</i>  | 3.69                              | Extracytoplasmic function (ECF) anti-sigma factor                          | -                | 0.004          |
| <i>CD630_17000 (ribD)</i>  | 3.65                              | Riboflavin biosynthesis protein                                            | H                | 0.018          |
| <i>CD630_05000</i>         | 3.61                              | putative antirestriction protein Tn5397 CTn3-Orf18                         | -                | 0.012          |
| <i>CD630_18900</i>         | 3.60                              | ABC-type transport system multidrug-family permease                        | -                | 0.014          |
| <i>CD630_10590 (thlA1)</i> | 3.56                              | Acetoacetyl-CoA thiolase 1                                                 | I                | 0.037          |
| <i>CD630_05060</i>         | 3.54                              | Reverse transcriptase/maturase/endonuclease Group II intron                | V                | 0.001          |
| <i>CD630_10580 (hbd)</i>   | 3.51                              | 3-hydroxybutyryl-CoA dehydrogenase                                         | I                | 0.045          |
| <i>CD630_04670</i>         | 3.43                              | putative hydrolase HAD superfamily subfamily IIB                           | HR               | 4.2E-05        |
| <i>CD630_04780 (spaF)</i>  | 3.43                              | ABC-type transport system lantibiotic/multidrug-family ATP-binding protein | V                | 0.015          |
| <i>CD630_33730 (mgtA)</i>  | 3.39                              | Magnesium-transporting ATPase P-type Tn916-like CTn7-Orf7                  | P                | 0.044          |
| <i>CD630_03580</i>         | 3.38                              | putative conjugative transposon protein Tn916-like CTn1-Orf3               | -                | 0.024          |
| <i>CD630_05102</i>         | 3.35                              | Fragment of putative conjugative transposon protein Tn5397 CTn3-Orf5       | -                | 6.0E-05        |
| <i>CD630_05101</i>         | 3.31                              | putative conjugative transposon protein Tn5397 CTn3-Orf8                   | -                | 0.001          |
| <i>CD630_15510 (hisH)</i>  | 3.29                              | Imidazole glycerol phosphate synthase subunit                              | E                | 0.001          |
| <i>CD630_05103</i>         | 3.27                              | putative conjugative transposon protein Tn5397 CTn3-Orf4                   | -                | 0.028          |
| <i>CD630_02910</i>         | 3.25                              | putative peptidase M20A family                                             | E                | 0.006          |
| <i>CD630_10560 (etfA3)</i> | 3.22                              | Electron transfer flavoprotein subunit alpha                               | C                | 0.027          |
| <i>CD630_16120</i>         | 3.18                              | putative amidohydrolase                                                    | Q                | 0.007          |
| <i>CD630_23790 (buk2)</i>  | 3.13                              | Butyrate kinase                                                            | C                | 0.013          |
| <i>CD630_15500 (hisB)</i>  | 3.12                              | Imidazoleglycerol-phosphate dehydratase                                    | E                | 0.001          |
| <i>CD630_15540 (hisI)</i>  | 3.10                              | Histidine biosynthesis bifunctional protein                                | E                | 0.018          |

|                            |      |                                                                                                   |    |         |
|----------------------------|------|---------------------------------------------------------------------------------------------------|----|---------|
| <i>CD630_10550 (etfB3)</i> | 3.07 | Electron transfer flavoproteins subunit beta                                                      | C  | 0.023   |
| <i>CD630_05100</i>         | 3.07 | putative RNA polymerase sigma factor Tn5397 CTn3-Orf7                                             | K  | 0.001   |
| <i>CD630_18020</i>         | 3.05 | putative hydrolase metallo-beta-lactamase superfamily                                             | R  | 0.036   |
| <i>CD630_08530 (oppB)</i>  | 3.02 | ABC-type transport system oligopeptide-family permease                                            | EP | 0.041   |
| <i>CD630_10570 (crt2)</i>  | 2.97 | 3-hydroxybutyryl-CoA dehydratase (Crotonase)                                                      | I  | 0.034   |
| <i>CD630_14240</i>         | 2.97 | conserved hypothetical protein                                                                    | -  | 0.001   |
| <i>CD630_05770</i>         | 2.96 | conserved hypothetical protein                                                                    | R  | 0.008   |
| <i>CD630_33750 (mgtC)</i>  | 2.96 | Magnesium-transporting ATPase protein Tn916-like CTn7-Orf10                                       | S  | 0.003   |
| <i>CD630_21640 (ldh)</i>   | 2.95 | L-lactate dehydrogenase                                                                           | C  | 0.004   |
| <i>CD630_10540 (bcd2)</i>  | 2.94 | Butyryl-CoA dehydrogenase                                                                         | I  | 0.017   |
| <i>CD630_15470 (hisZ)</i>  | 2.92 | ATP phosphoribosyltransferase regulatory subunit                                                  | E  | 0.044   |
| <i>CD630_20140 (ilvD)</i>  | 2.90 | Dihydroxy-acid dehydratase                                                                        | EG | 7.2E-05 |
| <i>CD630_08570 (oppF)</i>  | 2.88 | Fragment of ABC-type transport system oligopeptide-family ATP-binding protein                     | -  | 0.029   |
| <i>CD630_15490 (hisC)</i>  | 2.86 | Histidinol-phosphate aminotransferase                                                             | E  | 0.047   |
| <i>CD630_15520 (hisA)</i>  | 2.80 | 1-(5-phosphoribosyl)-5-[(5-phosphoribosylamino)methylideneamino]imidazole-4-carboxamide isomerase | E  | 0.044   |
| <i>CD630_16590</i>         | 2.69 | Cation-transporting ATPase                                                                        | P  | 0.003   |
| <i>CD630_20270</i>         | 2.69 | N-carbamoyl-L-amino acid hydrolase                                                                | E  | 0.047   |
| <i>CD630_33911</i>         | 2.66 | conserved hypothetical protein                                                                    | -  | 0.021   |
| <i>CD630_16310 (sodA)</i>  | 2.59 | spore coat protein-superoxide dismutase (Mn)                                                      | P  | 0.007   |
| <i>CD630_03830</i>         | 2.58 | putative cell-division FtsK/SpolIIE-family protein Tn916-like CTn1-Orf28                          | D  | 0.009   |
| <i>CD630_10860</i>         | 2.54 | putative peptidase M20D family                                                                    | R  | 0.033   |
| <i>CD630_21930 (cwp24)</i> | 2.54 | putative cell wall-binding protein                                                                | -  | 0.047   |
| <i>CD630_20910</i>         | 2.49 | putative xanthine/uracil permease                                                                 | F  | 0.010   |
| <i>CD630_17880</i>         | 2.48 | putative membrane protein                                                                         | -  | 0.027   |
| <i>CD630_16740</i>         | 2.47 | putative NADPH-dependent FMN reductase                                                            | R  | 0.005   |
| <i>CD630_22330 (asrA)</i>  | 2.43 | Anaerobic sulfite reductase subunit A                                                             | C  | 0.043   |
| <i>CD630_17021 (thiS)</i>  | 2.41 | Thiamine biosynthesis protein                                                                     | H  | 0.011   |
| <i>CD630_20280 (racX)</i>  | 2.39 | putative aspartate racemase                                                                       | M  | 1.2E-04 |
| <i>CD630_27090</i>         | 2.37 | putative oxidoreductase                                                                           | I  | 0.010   |
| <i>CD630_09260</i>         | 2.36 | putative phage protein                                                                            | -  | 0.050   |
| <i>CD630_13900</i>         | 2.35 | conserved hypothetical protein DUF819 family                                                      | S  | 2.8E-06 |
| <i>CD630_21270</i>         | 2.34 | putative exported protein                                                                         | -  | 0.042   |
| <i>CD630_27840 (cwp6)</i>  | 2.30 | putative N-acetylmuramoyl-L-alanineamidase autolysin                                              | M  | 0.006   |
| <i>CD630_23090</i>         | 2.29 | conserved hypothetical protein                                                                    | -  | 0.014   |
| <i>CD630_04800 (spaG)</i>  | 2.29 | ABC-type transport system lantibiotic/multidrug-family permease                                   | S  | 0.037   |
| <i>CD630_04890</i>         | 2.26 | putative phosphoribosylaminoimidazole-succinocarb oxamide synthetase                              | F  | 0.001   |
| <i>CD630_17151</i>         | 2.24 | conserved hypothetical protein                                                                    | -  | 0.016   |
| <i>CD630_15100</i>         | 2.24 | conserved hypothetical protein                                                                    | -  | 0.006   |
| <i>CD630_07290 (gcvH)</i>  | 2.23 | Glycine cleavage system H protein                                                                 | E  | 0.044   |
| <i>CD630_20751</i>         | 2.21 | conserved hypothetical protein                                                                    | -  | 0.018   |
| <i>CD630_16130 (cotA)</i>  | 2.18 | spore coat assembly protein                                                                       | -  | 0.022   |
| <i>CD630_10980</i>         | 2.17 | Two-component sensor histidine kinase Tn1549-like CTn4-Orf27                                      | T  | 4.3E-04 |
| <i>CD630_10850</i>         | 2.17 | putative membrane protein                                                                         | E  | 0.015   |
| <i>CD630_15560</i>         | 2.16 | putative polysaccharide deacetylase                                                               | G  | 0.001   |
| <i>CD630_15120 (panC)</i>  | 2.15 | Pantothenate synthetase                                                                           | H  | 0.018   |
| <i>CD630_16200</i>         | 2.15 | Transporter Major Facilitator Superfamily (MFS)                                                   | G  | 2.6E-04 |
| <i>CD630_33790</i>         | 2.14 | putative conjugative transposon protein Tn916-like CTn7-Orf15                                     | -  | 0.006   |
| <i>CD630_29620</i>         | 2.13 | conserved hypothetical protein                                                                    | -  | 2.8E-04 |
| <i>CD630_04440 (ortB)</i>  | 2.09 | 2-amino-4-ketopentanoate thiolase beta subunit                                                    | E  | 0.013   |
| <i>CD630_17170</i>         | 2.07 | uncharacterised protein                                                                           | S  | 0.038   |
| <i>CD630_27250</i>         | 2.07 | putative monogalactosyldiacylglycerol synthase                                                    | M  | 0.020   |
| <i>CD630_25171</i>         | 2.04 | putative phage protein                                                                            | -  | 0.001   |
| <i>CD630_19440</i>         | 2.03 | Fragment of conserved hypothetical protein                                                        | -  | 1.4E-04 |
| <i>CD630_26820 (pfo)</i>   | 2.03 | Pyruvate-ferredoxin oxidoreductase                                                                | C  | 0.021   |
| <i>CD630_15660 (ilvB)</i>  | 2.01 | Acetolactate synthase large subunit                                                               | EH | 0.040   |
| <i>CD630_19670</i>         | 2.01 | uncharacterised protein                                                                           | -  | 2.3E-04 |

#### Reduced in LL-37

|                           |      |                                      |   |         |
|---------------------------|------|--------------------------------------|---|---------|
| <i>CD630_23310 (mtlD)</i> | 0.12 | Mannitol-1-phosphate 5-dehydrogenase | G | 4.4E-04 |
|---------------------------|------|--------------------------------------|---|---------|

|                              |      |                                                                                      |    |         |
|------------------------------|------|--------------------------------------------------------------------------------------|----|---------|
| CD630_26140                  | 0.12 | uncharacterised protein DegV family                                                  | S  | 0.004   |
| CD630_23320 ( <i>mtIF</i> )  | 0.12 | PTS system mannitol-specific EIIA component                                          | G  | 0.001   |
| CD630_23330 ( <i>mtIR</i> )  | 0.14 | Transcription antiterminator PTS operon regulator                                    | K  | 2.3E-04 |
| CD630_23340 ( <i>mtIA</i> )  | 0.15 | PTS system mannitol-specific IICB component                                          | G  | 2.1E-05 |
| CD630_19120 ( <i>eutA</i> )  | 0.20 | Ethanolamine reactivating factor for ammonialyase eutBC                              | E  | 0.018   |
| CD630_19150 ( <i>eutL</i> )  | 0.21 | Ethanolamine carboxysome structural protein                                          | E  | 0.003   |
| CD630_31750 ( <i>cggR</i> )  | 0.22 | Transcriptional regulator SorC family                                                | K  | 0.049   |
| CD630_01631                  | 0.22 | conserved hypothetical protein                                                       | -  | 4.8E-04 |
| CD630_09950 ( <i>serA</i> )  | 0.23 | putative D-3-phosphoglycerate dehydrogenase                                          | HE | 0.007   |
| CD630_24291                  | 0.23 | putative 4Fe-4S ferredoxin iron-sulfur binding domain protein                        | C  | 0.019   |
| CD630_09080                  | 0.23 | putative phage protein                                                               | -  | 7.7E-06 |
| CD630_09960                  | 0.24 | conserved hypothetical protein                                                       | S  | 0.008   |
| CD630_30270                  | 0.25 | PTS system glucose-like IIA component                                                | G  | 0.021   |
| CD630_19220 ( <i>eutN</i> )  | 0.25 | Ethanolamine carboxysome structural protein                                          | QC | 0.016   |
| CD630_20160                  | 0.26 | conserved hypothetical protein                                                       | -  | 0.034   |
| 23S_rRNA                     | 0.27 | 23S ribosomal RNA                                                                    | -  | 0.026   |
| CD630_09360                  | 0.28 | putative phage endodeoxyribonuclease RusA-like                                       | L  | 0.007   |
| CD630_29341                  | 0.29 | putative phage protein                                                               | -  | 0.049   |
| CD630_29470                  | 0.30 | putative phage protein                                                               | -  | 0.020   |
| CD630_29320                  | 0.30 | putative phage protein                                                               | -  | 0.035   |
| CD630_28780 ( <i>fhuD</i> )  | 0.30 | ABC-type transport system ferrichrome-specific extracellular solute-binding protein  | P  | 0.004   |
| CD630_14890 ( <i>metN</i> )  | 0.32 | ABC-type transport system methionine-specific ATP-binding protein                    | P  | 0.035   |
| CD630_14900 ( <i>met I</i> ) | 0.32 | ABC-type transport system methionine-specific permease                               | P  | 0.034   |
| CD630_16632                  | 0.32 | conserved hypothetical protein                                                       | -  | 0.018   |
| CD630_17452                  | 0.34 | conserved hypothetical protein                                                       | R  | 0.026   |
| CD630_21710                  | 0.34 | Fragment of putative sodium:dicarboxylate symporter                                  | -  | 0.009   |
| CD630_31360 ( <i>bglA7</i> ) | 0.35 | 6-phospho-beta-glucosidase                                                           | G  | 0.001   |
| CD630_26640 ( <i>murE</i> )  | 0.35 | UDP-N-acetylmuramyl-tripeptide synthetase                                            | M  | 2.4E-04 |
| CD630_28770 ( <i>fhuB</i> )  | 0.35 | ABC-type transport system ferrichrome-specific permease                              | P  | 1.5E-04 |
| CD630_36010                  | 0.35 | D-alanyl-D-alanine carboxypeptidase M15 family                                       | M  | 0.013   |
| CD630_31000                  | 0.36 | putative C4-dicarboxylate anaerobic carrier Dcu family                               | S  | 0.046   |
| CD630_18470                  | 0.36 | putative conjugative transposon protein Tn1549-like CTn5-Orf3                        | -  | 0.001   |
| CD630_31150 ( <i>bglA4</i> ) | 0.37 | 6-phospho-beta-glucosidase                                                           | G  | 0.003   |
| CD630_13610                  | 0.37 | putative phage protein                                                               | -  | 0.002   |
| CD630_32570                  | 0.37 | putative polysaccharide deacetylase                                                  | G  | 0.016   |
| CD630_30340                  | 0.38 | Transcriptional regulator TrmB family                                                | K  | 0.013   |
| CD630_27491                  | 0.38 | Autoinducer prepeptide                                                               | -  | 2.5E-05 |
| CD630_25150                  | 0.38 | putative L-aspartate-beta-decarboxylase                                              | E  | 0.043   |
| CD630_27640                  | 0.38 | putative hydrolase HAD superfamily IIB subfamily                                     | R  | 0.003   |
| CD630_26710                  | 0.38 | ABC-type transport system ATP-binding protein putative oligopeptide transport system | EP | 0.028   |
| CD630_33440                  | 0.39 | putative cell-division FtsK/SpolIIE-family protein Tn916-like CTn6-Orf22             | D  | 0.007   |
| CD630_09340                  | 0.39 | putative phage protein                                                               | -  | 0.007   |
| CD630_35370 ( <i>phnH</i> )  | 0.39 | putative phosphonate metabolism protein                                              | P  | 0.007   |
| CD630_31370 ( <i>bglF5</i> ) | 0.39 | PTS system beta-glucoside-specific IIAB component                                    | G  | 0.022   |
| CD630_30360                  | 0.39 | Transporter Major Facilitator Superfamily (MFS)                                      | E  | 0.022   |
| CD630_08450                  | 0.40 | putative nuclease                                                                    | -  | 0.034   |
| CD630_22010                  | 0.40 | Transporter Major Facilitator Superfamily (MFS)                                      | G  | 0.045   |
| CD630_25090                  | 0.40 | putative glycoside hydrolase family 4                                                | G  | 0.016   |
| CD630_23710 ( <i>nadB</i> )  | 0.40 | L-aspartate oxidase (Quinolinate synthetase B)                                       | H  | 4.3E-04 |
| CD630_23720 ( <i>nadA</i> )  | 0.40 | Quinolinate synthetase A                                                             | H  | 0.003   |
| CD630_13640                  | 0.40 | putative phage XkdM-like protein                                                     | -  | 0.001   |
| CD630_19180 ( <i>eutK</i> )  | 0.40 | Ethanolamine carboxysome structural protein                                          | QC | 0.039   |
| CD630_11540                  | 0.40 | Transcriptional regulator PadR family                                                | K  | 0.025   |
| CD630_03270 ( <i>cbiO</i> )  | 0.40 | ABC-type transport system cobalt-specific ATP-binding protein                        | P  | 0.003   |
| CD630_05790                  | 0.40 | Transcriptional regulator TetR family                                                | K  | 0.027   |
| CD630_30990                  | 0.40 | putative amidohydrolase M20D family                                                  | R  | 0.031   |

|                            |      |                                                                                      |     |         |
|----------------------------|------|--------------------------------------------------------------------------------------|-----|---------|
| <i>CD630_03260 (cbiQ1)</i> | 0.41 | ABC-type transport system cobalt-specific permease                                   | P   | 0.002   |
| <i>CD630_18860</i>         | 0.41 | Transcriptional regulator PadR family                                                | K   | 0.014   |
| <i>CD630_30720</i>         | 0.41 | conserved hypothetical protein                                                       | S   | 0.019   |
| <i>CD630_03140</i>         | 0.41 | putative membrane protein                                                            | S   | 0.018   |
| <i>CD630_26860</i>         | 0.41 | putative membrane protein                                                            | -   | 0.009   |
| <i>CD630_24620 (grpE)</i>  | 0.41 | HSP-70 cofactor                                                                      | O   | 4.5E-04 |
| <i>CD630_29420</i>         | 0.41 | putative phage resolvase/integrase                                                   | -   | 1.4E-04 |
| <i>CD630_11261</i>         | 0.42 | Transcriptional regulator HTH-type                                                   | K   | 0.004   |
| <i>CD630_29400</i>         | 0.42 | putative phage protein                                                               | -   | 0.043   |
| <i>CD630_17540</i>         | 0.42 | ABC-type transport system multidrug-family permease                                  | -   | 0.018   |
| <i>CD630_03240 (cbiM)</i>  | 0.42 | Cobalamin biosynthesis protein                                                       | P   | 0.009   |
| <i>CD630_23700 (nadC)</i>  | 0.42 | Nicotinate-nucleotide pyrophosphorylase                                              | H   | 0.002   |
| <i>CD630_06140</i>         | 0.43 | conserved hypothetical protein                                                       | -   | 0.027   |
| <i>CD630_26700</i>         | 0.43 | ABC-type transport system ATP-binding protein putative oligopeptide transport system | E   | 0.025   |
| <i>CD630_01060 (cwID)</i>  | 0.43 | Germination-specific N-acetylmuramoyl-L-alanineamidase Autolysin                     | M   | 0.009   |
| <i>CD630_26650</i>         | 0.43 | Transcriptional regulator AraC family                                                | K   | 0.014   |
| <i>CD630_03901</i>         | 0.43 | conserved hypothetical protein                                                       | -   | 0.021   |
| <i>CD630_25160 (ansB)</i>  | 0.44 | L-asparaginase                                                                       | EJ  | 0.034   |
| <i>CD630_29360</i>         | 0.44 | putative phage protein                                                               | -   | 0.007   |
| <i>CD630_05670</i>         | 0.44 | uncharacterised protein DegV family                                                  | S   | 0.033   |
| <i>CD630_01250</i>         | 0.44 | putative cell wall endopeptidase                                                     | M   | 0.046   |
| <i>CD630_04090</i>         | 0.44 | putative replication initiation protein Tn1549-like CTn2-Orf2                        | -   | 0.029   |
| <i>CD630_29440</i>         | 0.44 | putative phage essential recombination functionprotein                               | -   | 0.040   |
| <i>CD630_12700</i>         | 0.45 | Two-component sensor histidine kinase                                                | T   | 0.001   |
| <i>CD630_30260</i>         | 0.45 | conserved hypothetical protein                                                       | TK  | 0.005   |
| <i>CD630_11710 (etfB4)</i> | 0.45 | Electron transfer flavoprotein subunit alpha                                         | C   | 0.008   |
| <i>CD630_29430</i>         | 0.45 | putative phage replication protein                                                   | L   | 0.010   |
| <i>CD630_09170</i>         | 0.45 | putative phage recombination protein Bet                                             | -   | 6.1E-05 |
| <i>CD630_06240</i>         | 0.45 | putative transcriptional regulator activator                                         | S   | 0.003   |
| <i>CD630_29710 (bioY)</i>  | 0.45 | Biotin synthase                                                                      | R   | 0.012   |
| <i>CD630_01930 (groS)</i>  | 0.46 | chaperonin                                                                           | O   | 0.003   |
| <i>CD630_20451</i>         | 0.46 | conserved hypothetical protein                                                       | -   | 1.9E-04 |
| <i>CD630_13450</i>         | 0.46 | Transcriptional regulator PadR family                                                | K   | 0.002   |
| <i>CD630_26870</i>         | 0.46 | conserved hypothetical protein                                                       | -   | 0.007   |
| <i>CD630_29490</i>         | 0.46 | Transcriptional regulator Phage-type                                                 | -   | 0.005   |
| <i>CD630_05780</i>         | 0.47 | Transporter Major Facilitator Superfamily (MFS)                                      | -   | 0.004   |
| <i>CD630_18270</i>         | 0.47 | Transcriptional regulator MarR family                                                | K   | 0.033   |
| <i>CD630_30250</i>         | 0.47 | putative ferredoxin iron-sulphur domain-containing protein                           | C   | 0.007   |
| <i>CD630_32090</i>         | 0.47 | Transcriptional regulator PadR family                                                | K   | 0.006   |
| <i>CD630_00470 (ispD)</i>  | 0.48 | 2-C-methyl-D-erythritol 4-phosphatecytidyltransferase                                | I   | 0.029   |
| <i>CD630_21430</i>         | 0.48 | Transcriptional regulator HTH-type                                                   | -   | 0.020   |
| <i>CD630_24610 (dnaK)</i>  | 0.48 | Chaperone protein dnaK (Heat shock protein 70)                                       | O   | 0.009   |
| <i>CD630_25110</i>         | 0.48 | Transcription antiterminator PTS operon regulator                                    | K   | 0.026   |
| <i>CD630_32100</i>         | 0.48 | conserved hypothetical protein                                                       | E   | 0.030   |
| <i>CD630_32620 (pstA)</i>  | 0.48 | ABC-type transport system phosphate-specific permease                                | P   | 0.045   |
| <i>CD630_25100</i>         | 0.48 | PTS system glucose-like IIBC component                                               | G   | 0.043   |
| <i>CD630_27880</i>         | 0.48 | putative membrane protein GtrA family                                                | S   | 0.004   |
| <i>CD630_13720</i>         | 0.48 | putative phage XkdT-like protein                                                     | -   | 2.2E-06 |
| <i>CD630_19210</i>         | 0.48 | putative ethanolamine utilization protein                                            | -   | 0.017   |
| <i>CD630_10280</i>         | 0.48 | putative signaling protein                                                           | TK  | 0.030   |
| <i>CD630_21510</i>         | 0.48 | putative membrane protein DUF819 family                                              | S   | 0.006   |
| <i>CD630_23300 (xpt)</i>   | 0.49 | Xanthine phosphoribosyltransferase (XPRTase)                                         | F   | 0.036   |
| <i>CD630_15800 (hom2)</i>  | 0.49 | Homoserine dehydrogenase                                                             | E   | 0.010   |
| <i>CD630_24630 (hrcA)</i>  | 0.49 | Transcriptional regulator Heat-inducibler epressor                                   | K   | 0.013   |
| <i>CD630_32220 (sdaB)</i>  | 0.49 | L-serine dehydratase                                                                 | E   | 0.005   |
| <i>CD630_27500 (agrB)</i>  | 0.49 | Accessory gene regulator                                                             | OTK | 0.001   |
| <i>CD630_32600 (phoU)</i>  | 0.49 | Phosphate uptake regulator                                                           | P   | 0.001   |
| <i>CD630_13460</i>         | 0.50 | conserved hypothetical protein DUF1700                                               | S   | 0.002   |

|                           |      |                                                                                |   |       |
|---------------------------|------|--------------------------------------------------------------------------------|---|-------|
| <i>CD630_26691</i>        | 0.50 | putative Na(+)/H(+) antiporter                                                 | P | 0.009 |
| <i>CD630_29330</i>        | 0.50 | Hypothetical protein                                                           | J | 0.010 |
| <i>CD630_03250 (cbiN)</i> | 0.50 | ABC-type transport system cobalt-specific extracellular solute-binding protein | P | 0.031 |

<sup>a</sup>Gene accession numbers are given for strain 630.

<sup>b</sup>Ratio of no LL-37/with LL-37 as determined by RNA sequencing analysis of 630 $\Delta$ *erm* grown in BHIS alone or BHIS supplemented with 2  $\mu$ g/ml LL-37 as described in Methods. Genes are included in this list if they had  $\geq 2$ -fold increase or decrease in expression and a *P* value  $\leq 0.05$  by Student's two-tailed *t*-test.

<sup>c</sup>COG (classification of gene) designations are based on the 2014 COG database. Letter designations correspond to the categories listed in the table below.

<sup>d</sup>*P*-values determined by Student's two-tailed *t*-test.

|   |                                                                        |
|---|------------------------------------------------------------------------|
| A | RNA processing and modification                                        |
| B | Chromatin Structure and dynamics                                       |
| C | Energy production and conversion                                       |
| D | Cell cycle control and mitosis                                         |
| E | Amino Acid metabolism and transport                                    |
| F | Nucleotide metabolism and transport                                    |
| G | Carbohydrate metabolism and transport                                  |
| H | Coenzyme metabolism                                                    |
| I | Lipid metabolism                                                       |
| J | Translation                                                            |
| K | Transcription                                                          |
| L | Replication and repair                                                 |
| M | Cell wall/membrane/envelop biogenesis                                  |
| N | Cell motility                                                          |
| O | Post-translational modification, protein turnover, chaperone functions |
| P | Inorganic ion transport and metabolism                                 |
| Q | Secondary Structure                                                    |
| T | Signal Transduction                                                    |
| U | Intracellular trafficking and secretion                                |
| Y | Nuclear structure                                                      |
| Z | Cytoskeleton                                                           |
| R | General Functional Prediction only                                     |
| S | Function Unknown                                                       |
| - | Unassigned                                                             |
