# Supplementary material for: The C. difficile clnRAB operon initiates adaptations to the host environment in response to LL-37
Source: PubMed Central journal article supplement (PMC6117091; doi:10.1371/journal.ppat.1007153), 2018-08-20
Supplement: ppat.1007153.s013.pdf [file ppat.1007153.s013.pdf]

**Table S2. LL-37 MIC and MBC values for *clinR* and *clinAB* mutants**

|                         | MIC <sup>a</sup> | MBC <sup>b</sup> |
|-------------------------|------------------|------------------|
| 630 $\Delta$ <i>erm</i> | 15               | 20               |
| <i>clinR</i>            | 15               | 30               |
| <i>clinAB</i>           | 15               | 20               |

<sup>a</sup> Minimum inhibitory concentration of LL-37 ( $\mu$ g/ml).

<sup>b</sup> Minimum bactericidal concentration of LL-37 ( $\mu$ g/ml).
