# Supplementary material for: The C. difficile clnRAB operon initiates adaptations to the host environment in response to LL-37
Source: PubMed Central journal article supplement (PMC6117091; doi:10.1371/journal.ppat.1007153), 2018-08-20
Supplement: ppat.1007153.s014.pdf [file ppat.1007153.s014.pdf]

**Table S3. MIC values for *clnR* and *clnAB* mutants in various antimicrobials**

|                         | Van <sup>a</sup> | Amp | PmB | Nis |
|-------------------------|------------------|-----|-----|-----|
| 630 $\Delta$ <i>erm</i> | 1                | 4   | 500 | 360 |
| <i>clnR</i>             | 1                | 4   | 500 | 360 |
| <i>clnAB</i>            | 1                | 4   | 500 | 360 |

<sup>a</sup>Values shown are  $\mu\text{g/ml}$ . Van: vancomycin, Amp: ampicillin, PmB: polymyxin B, Nis: nisin.
