# Supplementary material for: The C. difficile clnRAB operon initiates adaptations to the host environment in response to LL-37
Source: PubMed Central journal article supplement (PMC6117091; doi:10.1371/journal.ppat.1007153), 2018-08-20
Supplement: ppat.1007153.s015.pdf [file ppat.1007153.s015.pdf]

**Table S4. Genes differentially expressed in a *clnR* mutant in the presence/absence of LL-37**

| Gene <sup>a</sup>                     | <i>clnR</i> /<br>WT <sup>b</sup> | Product                                                         | COG <sup>c</sup> | <i>p</i> <sup>d</sup> |
|---------------------------------------|----------------------------------|-----------------------------------------------------------------|------------------|-----------------------|
| <b>ClnR activates (without LL-37)</b> |                                  |                                                                 |                  |                       |
| <i>CD630_16632</i>                    | 0.22                             | conserved hypothetical protein                                  | -                | 0.003                 |
| <i>CD630_23030</i>                    | 0.22                             | Fragment of putative phage transcriptional repressor            | -                | 0.003                 |
| <i>CD630_35370 (phnH)</i>             | 0.22                             | putative phosphonate metabolism protein                         | P                | 9.0E-05               |
| <i>CD630_19280</i>                    | 0.22                             | putative membrane protein                                       | D                | 9.0E-05               |
| <i>CD630_29341</i>                    | 0.23                             | putative phage protein                                          | -                | 0.009                 |
| <i>CD630_01631</i>                    | 0.24                             | conserved hypothetical protein                                  | -                | 0.013                 |
| <i>CD630_13700</i>                    | 0.25                             | putative phage XkdS-like protein                                | -                | 0.018                 |
| <i>CD630_32770</i>                    | 0.26                             | PTS system mannose/fructose/sorbose IIC component               | G                | 0.004                 |
| <i>CD630_29330</i>                    | 0.32                             | Hypothetical protein                                            | J                | 0.005                 |
| <i>CD630_04090</i>                    | 0.33                             | putative replication initiation protein Tn1549-like CTn2-Orf2   | -                | 0.032                 |
| <i>CD630_00410</i>                    | 0.33                             | PTS system galactitol-specific IIA component                    | GT               | 2.7E-04               |
| <i>CD630_11980 (spolIIAG)</i>         | 0.33                             | Stage III sporulation protein AG                                | -                | 0.001                 |
| <i>CD630_07400</i>                    | 0.35                             | putative pyridoxal phosphate-dependent aminotransferase         | E                | 0.008                 |
| <i>CD630_07420</i>                    | 0.37                             | putative ethanolamine transporter                               | E                | 0.003                 |
| <i>CD630_36361</i>                    | 0.38                             | conserved hypothetical protein                                  | -                | 0.015                 |
| <i>CD630_29370</i>                    | 0.39                             | putative phage protein                                          | -                | 0.011                 |
| <i>CD630_01350</i>                    | 0.41                             | PTS system lactose/cellobiose-family IIA component              | G                | 0.032                 |
| <i>CD630_23260</i>                    | 0.41                             | PTS system fructose/mannitol family IIBc component              | G                | 0.001                 |
| <i>CD630_24170</i>                    | 0.42                             | PTS system Sorbitol-like IIB component                          | G                | 0.003                 |
| <i>CD630_26870</i>                    | 0.43                             | conserved hypothetical protein                                  | -                | 0.002                 |
| <i>CD630_01981</i>                    | 0.43                             | conserved hypothetical protein                                  | -                | 0.042                 |
| <i>CD630_02850</i>                    | 0.44                             | PTS system mannose/fructose/sorbose IIB component               | G                | 0.001                 |
| <i>CD630_29490</i>                    | 0.44                             | Transcriptional regulator Phage-type                            | -                | 3.1E-04               |
| <i>CD630_13630</i>                    | 0.45                             | putative phage XkdK-like protein                                | -                | 0.016                 |
| <i>CD630_29360</i>                    | 0.45                             | putative phage protein                                          | -                | 0.009                 |
| <i>CD630_16490</i>                    | 0.45                             | ABC-type transport system iron-family ATP-binding protein       | P                | 0.022                 |
| <i>CD630_21970</i>                    | 0.46                             | putative ferredoxin/ferredoxin oxidoreductase                   | C                | 0.017                 |
| <i>CD630_12332</i>                    | 0.46                             | conserved hypothetical protein                                  | -                | 0.034                 |
| <i>CD630_26570</i>                    | 0.49                             | conserved hypothetical protein                                  | -                | 0.006                 |
| <i>CD630_04200</i>                    | 0.49                             | putative cell surface protein Tn1549-like CTn2-Orf15            | R                | 0.006                 |
| <i>CD630_21021</i>                    | 0.49                             | conserved hypothetical protein                                  | -                | 0.006                 |
| <i>CD630_04880 (orr)</i>              | 0.50                             | putative small multidrug resistance SugE-like protein           | P                | 0.041                 |
| <b>ClnR represses (without LL-37)</b> |                                  |                                                                 |                  |                       |
| <i>CD630_16180 (clnA)</i>             | 57.26                            | ABC-type transport system multidrug-family ATP-binding protein  | V                | 0.021                 |
| <i>CD630_16190 (clnB)</i>             | 53.69                            | ABC-type transport system multidrug-family permease             | -                | 0.001                 |
| <i>CD630_12400 (vanZ)</i>             | 21.50                            | Teicoplanin resistance protein                                  | V                | 0.017                 |
| <i>CD630_33370</i>                    | 3.37                             | putative membrane protein Tn916-like CTn6-Orf14                 | B                | 0.006                 |
| <i>CD630_07970</i>                    | 2.96                             | putative pyruvate carboxyltransferase                           | E                | 0.014                 |
| <i>CD630_16310 (sodA)</i>             | 2.70                             | spore coat protein-superoxide dismutase                         | P                | 4.3E-04               |
| <i>CD630_01820</i>                    | 2.47                             | conserved hypothetical protein                                  | -                | 0.017                 |
| <i>CD630_18840</i>                    | 2.43                             | conserved hypothetical protein                                  | -                | 0.042                 |
| <i>CD630_22180 (int2)</i>             | 2.43                             | Fragment of putative integrase                                  | -                | 0.042                 |
| <i>CD630_03710</i>                    | 2.43                             | putative conjugative transposon protein Tn916-like CTn1-Orf16   | -                | 0.042                 |
| <i>CD630_15111</i>                    | 2.26                             | conserved hypothetical protein                                  | -                | 0.037                 |
| <i>CD630_16680</i>                    | 2.13                             | putative membrane protein                                       | -                | 3.4E-06               |
| <i>CD630_27340</i>                    | 2.09                             | putative Na <sup>+</sup> /H <sup>+</sup> antiporter NhaC family | C                | 0.001                 |
| <i>CD630_12450</i>                    | 2.08                             | conserved hypothetical protein                                  | -                | 0.032                 |
| <b>ClnR activates (with LL-37)</b>    |                                  |                                                                 |                  |                       |
| <i>CD630_23540 (grdE)</i>             | 0.06                             | Betaine reductase component B subunit                           | -                | 0.001                 |
| <i>CD630_23520 (grdA)</i>             | 0.07                             | Glycine reductase complex selenoprotein A (selenocysteine)      | -                | 1.5E-04               |
| <i>CD630_02850</i>                    | 0.07                             | PTS system mannose/fructose/sorbose IIB component               | G                | 0.002                 |
| <i>CD630_02840</i>                    | 0.08                             | PTS system mannose/fructose/sorbose IIA component               | G                | 0.005                 |
| <i>CD630_23550 (trxA2)</i>            | 0.09                             | Thioredoxin 2                                                   | O                | 0.005                 |
| <i>CD630_23260</i>                    | 0.09                             | PTS system fructose/mannitol family IIB component               | G                | 0.008                 |
| <i>CD630_02880</i>                    | 0.10                             | PTS system mannose/fructose/sorbose IIC component               | G                | 3.3E-04               |
| <i>CD630_16080</i>                    | 0.13                             | ABC-type transport system multidrug-family permease             | -                | 0.003                 |

|                              |      |                                                                         |    |         |
|------------------------------|------|-------------------------------------------------------------------------|----|---------|
| CD630_02890                  | 0.13 | PTS system mannose/fructose/sorbose IID component                       | G  | 0.002   |
| CD630_02860                  | 0.13 | PTS system mannose/fructose/sorbose IIA component                       | G  | 0.014   |
| CD630_16060                  | 0.13 | Transcriptional regulator GntR family                                   | K  | 0.001   |
| CD630_16100                  | 0.13 | conserved hypothetical protein                                          | -  | 0.001   |
| CD630_16110                  | 0.14 | conserved hypothetical protein                                          | -  | 0.003   |
| CD630_02870                  | 0.14 | PTS system mannose/fructose/sorbose IIB component                       | G  | 0.002   |
| CD630_23570 ( <i>grdX</i> )  | 0.14 | putative glycine reductase complex component                            | -  | 0.017   |
| CD630_16090                  | 0.15 | conserved hypothetical protein                                          | -  | 0.004   |
| CD630_23560 ( <i>trxB3</i> ) | 0.15 | Thioredoxin reductase 3                                                 | O  | 0.018   |
| CD630_23490 ( <i>grdC</i> )  | 0.16 | Glycine reductase complex component C                                   | I  | 0.007   |
| CD630_16070                  | 0.16 | ABC-type transport system multidrug-family ATP-binding protein          | V  | 0.003   |
| CD630_20751                  | 0.18 | conserved hypothetical protein                                          | -  | 0.002   |
| CD630_29290                  | 0.18 | putative phage protein                                                  | -  | 0.004   |
| CD630_04200                  | 0.20 | putative cell surface protein Tn1549-like CTn2-Orf15                    | R  | 0.001   |
| CD630_23240                  | 0.21 | putative sugar-phosphate dehydrogenase                                  | ER | 0.050   |
| CD630_33740                  | 0.21 | putative conjugative transposon protein Tn916-like CTn7-Orf8            | -  | 6.2E-05 |
| CD630_23030                  | 0.21 | Fragment of putative phage transcriptional repressor                    | -  | 0.006   |
| CD630_26000 ( <i>cstA</i> )  | 0.22 | Carbon starvation protein                                               | T  | 1.4E-05 |
| CD630_23810 ( <i>iorA</i> )  | 0.22 | Indole pyruvate ferredoxin/ flavodoxin oxidoreductase                   | C  | 8.8E-05 |
| CD630_04670                  | 0.24 | putative hydrolase HAD superfamily subfamily IIB                        | HR | 0.001   |
| CD630_23800 ( <i>iorB</i> )  | 0.24 | Indole pyruvate ferredoxin/ flavodoxin oxidoreductase                   | C  | 4.0E-04 |
| CD630_25990                  | 0.24 | putative transcriptional regulator                                      | J  | 0.040   |
| CD630_02900                  | 0.25 | conserved hypothetical protein                                          | -  | 0.002   |
| CD630_23820                  | 0.26 | putative pyridoxal phosphate-dependent transferase                      | E  | 0.002   |
| CD630_29410                  | 0.27 | putative phage single-strand DNA-binding protein                        | L  | 0.037   |
| CD630_16180 ( <i>clnA</i> )  | 0.27 | ABC-type transport system multidrug-family ATP-binding protein          | V  | 0.005   |
| CD630_33750 ( <i>mgtC</i> )  | 0.27 | Magnesium-transporting ATPase protein Tn916-like CTn7-Orf10             | S  | 0.002   |
| CD630_16190 ( <i>clnB</i> )  | 0.27 | ABC-type transport system multidrug-family permease                     | -  | 0.011   |
| CD630_33730 ( <i>mgtA</i> )  | 0.27 | Magnesium-transporting ATPase P-type Tn916-like CTn7-Orf7               | P  | 0.001   |
| CD630_00330                  | 0.28 | putative glycoside hydrolase                                            | G  | 0.048   |
| CD630_07400                  | 0.28 | putative pyridoxal phosphate-dependent aminotransferase                 | E  | 0.045   |
| CD630_05490                  | 0.28 | conserved hypothetical protein                                          | -  | 0.001   |
| CD630_33741                  | 0.29 | putative conjugative transposon protein Tn916-like CTn7-Orf9            | -  | 0.002   |
| CD630_28130 ( <i>garR</i> )  | 0.30 | Tartronate semialdehyde reductase                                       | I  | 0.042   |
| CD630_29370                  | 0.31 | putative phage protein                                                  | -  | 0.001   |
| CD630_00220 ( <i>fusA1</i> ) | 0.31 | Elongation factor G                                                     | J  | 0.013   |
| CD630_18570                  | 0.31 | putative cell wall hydrolase Tn1549-like CTn5-Orf13                     | M  | 0.038   |
| CD630_18880 ( <i>rsiU</i> )  | 0.32 | Extracytoplasmic function (ECF) anti-sigma factor                       | -  | 0.004   |
| CD630_05000                  | 0.32 | putative antirestriction protein Tn5397 CTn3-Orf18                      | V  | 0.006   |
| CD630_17970                  | 0.34 | Coenzyme A disulfide reductase                                          | R  | 0.037   |
| CD630_01350                  | 0.34 | PTS system lactose/cellobiose-family IIA component                      | G  | 0.048   |
| CD630_04960                  | 0.34 | putative conjugative transposon protein DUF961 family Tn5397 CTn3-Orf23 | -  | 0.007   |
| CD630_23480 ( <i>grdD</i> )  | 0.34 | Glycine reductase complex component C                                   | I  | 0.015   |
| CD630_04980                  | 0.34 | putative cell-division FtsK/SpolIII-family protein Tn5397 CTn3-Orf21    | D  | 0.001   |
| CD630_17000 ( <i>ribD</i> )  | 0.35 | Riboflavin biosynthesis protein                                         | H  | 0.014   |
| CD630_28620                  | 0.36 | putative peptidase M19 family                                           | E  | 0.016   |
| CD630_18560                  | 0.36 | putative hydrolase Tn1549-like CTn5-Orf12                               | U  | 0.002   |
| CD630_15970                  | 0.36 | conserved hypothetical protein                                          | -  | 3.0E-04 |
| CD630_28240                  | 0.36 | Fragment of putative membrane protein                                   | -  | 0.020   |
| CD630_33721                  | 0.36 | putative conjugative transposon protein Tn916-like CTn7-Orf5            | -  | 0.004   |
| CD630_04970                  | 0.36 | putative conjugative transposon protein DUF961 family Tn5397 CTn3-Orf22 | -  | 0.008   |
| CD630_05103                  | 0.37 | putative conjugative transposon protein Tn5397%2CCTn3-Orf4              | -  | 0.013   |
| CD630_04990                  | 0.38 | putative replication initiation factor Tn5397 CTn3-Orf20                | L  | 0.001   |
| CD630_22820                  | 0.39 | PTS system fructose/mannitol family IIA component                       | GT | 0.024   |
| CD630_04991                  | 0.39 | putative conjugative transposon protein Tn5397 CTn3-Orf19               | -  | 0.005   |
| CD630_02910                  | 0.40 | putative peptidase M20A family                                          | E  | 0.009   |
| CD630_16980 ( <i>ribBA</i> ) | 0.40 | GTP cyclohydrolase-2 Riboflavin biosynthesis protein                    | H  | 0.012   |
| CD630_05100                  | 0.40 | putative RNA polymerase sigma factor Tn5397 CTn3-Orf7                   | K  | 0.001   |
| CD630_17960                  | 0.40 | putative nitrite and sulfite reductase subunit                          | C  | 0.044   |

|                              |      |                                                                      |    |         |
|------------------------------|------|----------------------------------------------------------------------|----|---------|
| CD630_05102                  | 0.40 | Fragment of putative conjugative transposon protein Tn5397 CTn3-Orf5 | -  | 0.002   |
| CD630_05060                  | 0.41 | Reverse transcriptase/maturase/endonuclease Group II intron          | V  | 0.001   |
| CD630_33722                  | 0.41 | putative conjugative transposon protein Tn916-like CTn7-Orf6         | -  | 0.002   |
| CD630_23790 ( <i>buk2</i> )  | 0.41 | Butyrate kinase                                                      | C  | 2.5E-04 |
| CD630_18870 ( <i>csfU</i> )  | 0.41 | Extracytoplasmic function (ECF) sigma factor                         | K  | 0.001   |
| CD630_28280                  | 0.41 | putative pyridoxal phosphate-dependent transferase                   | E  | 0.029   |
| CD630_05101                  | 0.41 | putative conjugative transposon protein Tn5397 CTn3-Orf8             | -  | 1.6E-04 |
| CD630_07390                  | 0.42 | putative exported protein                                            | -  | 1.0E-04 |
| CD630_15431                  | 0.43 | conserved hypothetical protein                                       | -  | 0.015   |
| CD630_20750 ( <i>pbuX</i> )  | 0.43 | putative xanthine permease                                           | F  | 0.001   |
| CD630_28110                  | 0.43 | conserved hypothetical protein                                       | S  | 0.010   |
| CD630_08650                  | 0.44 | putative ADP-ribose binding protein                                  | R  | 0.013   |
| CD630_06790                  | 0.45 | conserved hypothetical protein                                       | R  | 0.018   |
| CD630_04890                  | 0.45 | putative phosphoribosylaminoimidazole-succinocarboxamide synthetase  | F  | 0.001   |
| CD630_23590                  | 0.46 | putative hydrolase HAD superfamily subfamily IIB                     | R  | 2.9E-04 |
| CD630_28590                  | 0.46 | putative D-aminoacylase                                              | Q  | 0.018   |
| CD630_18890                  | 0.47 | ABC-type transport system multidrug-family ATP-binding protein       | V  | 0.004   |
| CD630_06770 ( <i>csfT</i> )  | 0.47 | Extracytoplasmic function (ECF) sigma factor                         | K  | 0.001   |
| CD630_21600                  | 0.47 | putative membrane protein                                            | V  | 0.019   |
| CD630_16220                  | 0.47 | peptidase propeptide and ypeb domain protein                         | S  | 0.034   |
| CD630_24020                  | 0.47 | putative cell wall hydrolase phosphatase-associated protein          | M  | 0.008   |
| CD630_18900                  | 0.47 | ABC-type transport system multidrug-family permease                  | O  | 0.007   |
| CD630_04400 ( <i>cwp27</i> ) | 0.47 | putative cell wall binding protein                                   | -  | 8.9E-05 |
| CD630_29490                  | 0.48 | Transcriptional regulator Phage-type                                 | -  | 0.004   |
| CD630_27080 ( <i>aroE2</i> ) | 0.48 | Shikimate dehydrogenase 2                                            | E  | 8.6E-05 |
| CD630_09370                  | 0.48 | putative phage anti-repressor                                        | K  | 0.012   |
| CD630_25670                  | 0.49 | PTS system mannose-specific IIB component                            | G  | 0.009   |
| CD630_05020                  | 0.49 | putative ATPase Tn5397 CTn3-Orf16                                    | L  | 0.002   |
| CD630_29300                  | 0.49 | putative phage anti-repressor protein                                | K  | 0.012   |
| CD630_27840 ( <i>cwp6</i> )  | 0.49 | putative N-acetylmuramoyl-L-alanineamidase autolysin                 | M  | 0.002   |
| CD630_01420                  | 0.49 | putative RNA-binding protein                                         | J  | 0.028   |
| CD630_22490                  | 0.50 | putative ATPase                                                      | R  | 0.001   |
| CD630_21910                  | 0.50 | putative phosphoesterase                                             | ER | 0.008   |
| CD630_23090                  | 0.50 | conserved hypothetical protein                                       | -  | 0.039   |

### ClnR represses (with LL-37)

|                                |      |                                                                                       |    |         |
|--------------------------------|------|---------------------------------------------------------------------------------------|----|---------|
| CD630_26140                    | 7.62 | uncharacterised protein DegV family                                                   | S  | 0.017   |
| CD630_06680                    | 4.19 | Two-component response regulator                                                      | K  | 0.014   |
| CD630_06690                    | 4.01 | Two-component sensor histidine kinase                                                 | T  | 0.011   |
| CD630_27491 ( <i>agrD</i> )    | 3.46 | Autoinducer prepeptide                                                                | -  | 0.002   |
| CD630_11920                    | 3.10 | Stage III sporulation protein AA                                                      | S  | 0.039   |
| CD630_24291                    | 3.10 | putative 4Fe-4S ferredoxin iron-sulfur binding domain protein                         | C  | 0.039   |
| CD630_28370                    | 2.74 | putative membrane protein                                                             | S  | 0.046   |
| CD630_04370                    | 2.74 | Fragment of integrase Tn1549-like CTn2                                                | -  | 0.046   |
| CD630_09780                    | 2.52 | Transcriptional regulator beta-lactams repressor Phage-type                           | -  | 0.011   |
| CD630_22290                    | 2.49 | putative membrane protein                                                             | S  | 0.049   |
| CD630_10950                    | 2.48 | ABC-type transport system multidrug-family permease Tn1549-like CTn4-Orf30            | -  | 0.030   |
| CD630_25150                    | 2.45 | putative L-aspartate-beta-decarboxylase                                               | E  | 0.039   |
| CD630_04640                    | 2.45 | putative beta-lactamase-like hydrolase                                                | R  | 0.018   |
| CD630_26640 ( <i>murE</i> )    | 2.42 | UDP-N-acetylmuramyl-tripeptide synthetase                                             | M  | 0.009   |
| CD630_09950 ( <i>serA</i> )    | 2.40 | putative D-3-phosphoglycerate dehydrogenase                                           | HE | 0.019   |
| CD630_09960                    | 2.34 | conserved hypothetical protein                                                        | S  | 0.015   |
| CD630_21510                    | 2.34 | putative membrane protein DUF819 family                                               | S  | 0.007   |
| CD630_33360                    | 2.32 | putative cell wall hydrolase Tn916-like CTn6-Orf13                                    | M  | 5.0E-04 |
| CD630_01260 ( <i>spolIID</i> ) | 2.29 | Stage III sporulation protein D                                                       | -  | 0.002   |
| CD630_30730                    | 2.24 | putative membrane protein                                                             | -  | 0.008   |
| CD630_10970                    | 2.22 | ABC-type transport system multidrug-family ATP-binding protein Tn1549-like CTn4-Orf28 | V  | 0.008   |
| CD630_25290                    | 2.18 | conserved hypothetical protein                                                        | -  | 0.021   |
| CD630_21710                    | 2.18 | Fragment of putative sodium:dicarboxylate symporter                                   | -  | 0.036   |

|                           |      |                                                                                      |   |         |
|---------------------------|------|--------------------------------------------------------------------------------------|---|---------|
| <i>CD630_08220</i>        | 2.11 | ABC-type transport system multidrug-family ATP-binding protein                       | V | 0.016   |
| <i>CD630_26700</i>        | 2.10 | ABC-type transport system ATP-binding protein putative oligopeptide transport system | E | 0.031   |
| <i>CD630_25940 (uraA)</i> | 2.10 | ABC-type transport system uracil-specific permease                                   | F | 4.5E-04 |
| <i>CD630_08230</i>        | 2.05 | ABC-type transport system multidrug-family permease                                  | - | 0.042   |
| <i>CD630_30230</i>        | 2.03 | conserved hypothetical protein                                                       | - | 0.034   |
| <i>CD630_23750</i>        | 2.03 | uncharacterised protein                                                              | - | 0.022   |

<sup>a</sup>Gene accession numbers are given for strain 630. Gene *CD630\_20072 (ermB)* is excluded from these tables because it is an artifact of the insertional disruption used to generate the *clnR* mutant.

<sup>b</sup>Ratio of expression in *clnR* mutant/630 $\Delta$ *erm*, as determined by RNA sequencing analysis of 630 $\Delta$ *erm* and *clnR* grown in BHIS alone or BHIS supplemented with 2  $\mu$ g/ml LL-37 as described in Methods. Fold-change represents the ratio of expression in *clnR*/630 $\Delta$ *erm* in the condition indicated (with or without LL-37). Genes are included in this list if they had  $\geq 2$ -fold increase or decrease in expression and a *p* value  $\leq 0.05$  by Student's two-tailed *t*-test.

<sup>c</sup>COG designations are based on the 2014 COG database. Letter designations correspond to the categories listed in the table associated with Table S1.

<sup>d</sup>*p* values determined by Student's two-tailed *t*-test.
