# Supplementary material for: The C. difficile clnRAB operon initiates adaptations to the host environment in response to LL-37
Source: PubMed Central journal article supplement (PMC6117091; doi:10.1371/journal.ppat.1007153), 2018-08-20
Supplement: ppat.1007153.s016.pdf [file ppat.1007153.s016.pdf]

**Table S1. Genes differentially expressed in LL-37**

| Gene <sup>a</sup>          | Fold change in LL-37 <sup>b</sup> | Product                                                                    | COG <sup>c</sup> | p <sup>d</sup> |
|----------------------------|-----------------------------------|----------------------------------------------------------------------------|------------------|----------------|
| <b>Induced in LL-37</b>    |                                   |                                                                            |                  |                |
| <i>CD630_16180 (clnA)</i>  | 202.99                            | ABC-type transport system multidrug-family ATP-binding protein             | V                | 0.023          |
| <i>CD630_16190 (clnB)</i>  | 192.16                            | ABC-type transport system multidrug-family permease                        | -                | 0.001          |
| <i>CD630_16170 (clnR)</i>  | 186.82                            | Transcriptional regulator GntR family                                      | K                | 0.005          |
| <i>CD630_16100</i>         | 64.45                             | conserved hypothetical protein                                             | -                | 4.2E-04        |
| <i>CD630_16110</i>         | 34.77                             | conserved hypothetical protein                                             | -                | 0.028          |
| <i>CD630_16090</i>         | 30.62                             | conserved hypothetical protein                                             | -                | 0.030          |
| <i>CD630_16070</i>         | 30.25                             | ABC-type transport system multidrug-family ATP-binding protein             | V                | 0.011          |
| <i>CD630_12400 (vanZ)</i>  | 28.43                             | Teicoplanin resistance protein                                             | V                | 0.009          |
| <i>CD630_23410 (abfD)</i>  | 14.81                             | Gamma-aminobutyrate metabolism dehydratase/isomerase                       | Q                | 0.005          |
| <i>CD630_23820</i>         | 13.76                             | putative pyridoxal phosphate-dependent transferase                         | E                | 0.051          |
| <i>CD630_23810 (iorA)</i>  | 13.66                             | Indole pyruvate ferredoxin/flavodoxin oxidoreductase                       | C                | 0.007          |
| <i>CD630_23390 (cat2)</i>  | 13.27                             | 4-hydroxybutyrate CoA transferase                                          | C                | 0.016          |
| <i>CD630_23400</i>         | 13.14                             | uncharacterised protein                                                    | -                | 0.053          |
| <i>CD630_23380 (4hbD)</i>  | 12.95                             | 4-hydroxybutyrate dehydrogenase                                            | C                | 0.012          |
| <i>CD630_23420 (sucD)</i>  | 12.71                             | Succinate-semialdehyde dehydrogenase                                       | C                | 0.009          |
| <i>CD630_23430 (cat1)</i>  | 11.85                             | Succinyl-CoA:coenzyme A transferase                                        | C                | 0.007          |
| <i>CD630_23440</i>         | 10.85                             | putative membrane protein (butyrate conversion)                            | R                | 0.005          |
| <i>CD630_23800 (iorB)</i>  | 10.81                             | Indole pyruvate ferredoxin/flavodoxin oxidoreductase                       | C                | 0.010          |
| <i>CD630_12382</i>         | 5.60                              | Fragment of conserved hypothetical protein                                 | -                | 0.005          |
| <i>CD630_05500</i>         | 5.52                              | putative membrane protein                                                  | -                | 0.053          |
| <i>CD630_18870 (csfU)</i>  | 5.34                              | Extracytoplasmic function (ECF) sigma factor                               | K                | 0.002          |
| <i>CD630_05490</i>         | 4.74                              | conserved hypothetical protein                                             | -                | 0.049          |
| <i>CD630_18890</i>         | 4.54                              | ABC-type transport system multidrug-family ATP-binding protein             | V                | 1.9E-04        |
| <i>CD630_25560</i>         | 4.24                              | PTS system fructose/mannitol-family IIB component                          | GT               | 0.019          |
| <i>CD630_16990 (ribE)</i>  | 4.23                              | Riboflavin synthase alpha subunit                                          | H                | 0.035          |
| <i>CD630_04900</i>         | 4.13                              | putative sugar-phosphate dehydrogenase                                     | ER               | 0.049          |
| <i>CD630_04980</i>         | 4.13                              | putative cell-division FtsK/SpoIIIE-family protein Tn5397 CTn3-Orf21       | D                | 0.012          |
| <i>CD630_04960</i>         | 4.13                              | putative conjugative transposon protein DUF961 family Tn5397 CTn3-Orf23    | -                | 0.039          |
| <i>CD630_33740</i>         | 3.92                              | putative conjugative transposon protein Tn916-like CTn7-Orf8               | -                | 0.011          |
| <i>CD630_04970</i>         | 3.86                              | putative conjugative transposon protein DUF961 family Tn5397 CTn3-Orf22    | -                | 0.008          |
| <i>CD630_18880 (rsiU)</i>  | 3.69                              | Extracytoplasmic function (ECF) anti-sigma factor                          | -                | 0.004          |
| <i>CD630_17000 (ribD)</i>  | 3.65                              | Riboflavin biosynthesis protein                                            | H                | 0.018          |
| <i>CD630_05000</i>         | 3.61                              | putative antirestriction protein Tn5397 CTn3-Orf18                         | -                | 0.012          |
| <i>CD630_18900</i>         | 3.60                              | ABC-type transport system multidrug-family permease                        | -                | 0.014          |
| <i>CD630_10590 (thlA1)</i> | 3.56                              | Acetoacetyl-CoA thiolase 1                                                 | I                | 0.037          |
| <i>CD630_05060</i>         | 3.54                              | Reverse transcriptase/maturase/endonuclease Group II intron                | V                | 0.001          |
| <i>CD630_10580 (hbd)</i>   | 3.51                              | 3-hydroxybutyryl-CoA dehydrogenase                                         | I                | 0.045          |
| <i>CD630_04670</i>         | 3.43                              | putative hydrolase HAD superfamily subfamily IIB                           | HR               | 4.2E-05        |
| <i>CD630_04780 (spaF)</i>  | 3.43                              | ABC-type transport system lantibiotic/multidrug-family ATP-binding protein | V                | 0.015          |
| <i>CD630_33730 (mgtA)</i>  | 3.39                              | Magnesium-transporting ATPase P-type Tn916-like CTn7-Orf7                  | P                | 0.044          |
| <i>CD630_03580</i>         | 3.38                              | putative conjugative transposon protein Tn916-like CTn1-Orf3               | -                | 0.024          |
| <i>CD630_05102</i>         | 3.35                              | Fragment of putative conjugative transposon protein Tn5397 CTn3-Orf5       | -                | 6.0E-05        |
| <i>CD630_05101</i>         | 3.31                              | putative conjugative transposon protein Tn5397 CTn3-Orf8                   | -                | 0.001          |
| <i>CD630_15510 (hisH)</i>  | 3.29                              | Imidazole glycerol phosphate synthase subunit                              | E                | 0.001          |
| <i>CD630_05103</i>         | 3.27                              | putative conjugative transposon protein Tn5397 CTn3-Orf4                   | -                | 0.028          |
| <i>CD630_02910</i>         | 3.25                              | putative peptidase M20A family                                             | E                | 0.006          |
| <i>CD630_10560 (etfA3)</i> | 3.22                              | Electron transfer flavoprotein subunit alpha                               | C                | 0.027          |
| <i>CD630_16120</i>         | 3.18                              | putative amidohydrolase                                                    | Q                | 0.007          |
| <i>CD630_23790 (buk2)</i>  | 3.13                              | Butyrate kinase                                                            | C                | 0.013          |
| <i>CD630_15500 (hisB)</i>  | 3.12                              | Imidazoleglycerol-phosphate dehydratase                                    | E                | 0.001          |
| <i>CD630_15540 (hisI)</i>  | 3.10                              | Histidine biosynthesis bifunctional protein                                | E                | 0.018          |

|                            |      |                                                                                                   |    |         |
|----------------------------|------|---------------------------------------------------------------------------------------------------|----|---------|
| <i>CD630_10550 (etfB3)</i> | 3.07 | Electron transfer flavoproteins subunit beta                                                      | C  | 0.023   |
| <i>CD630_05100</i>         | 3.07 | putative RNA polymerase sigma factor Tn5397 CTn3-Orf7                                             | K  | 0.001   |
| <i>CD630_18020</i>         | 3.05 | putative hydrolase metallo-beta-lactamase superfamily                                             | R  | 0.036   |
| <i>CD630_08530 (oppB)</i>  | 3.02 | ABC-type transport system oligopeptide-family permease                                            | EP | 0.041   |
| <i>CD630_10570 (crt2)</i>  | 2.97 | 3-hydroxybutyryl-CoA dehydratase (Crotonase)                                                      | I  | 0.034   |
| <i>CD630_14240</i>         | 2.97 | conserved hypothetical protein                                                                    | -  | 0.001   |
| <i>CD630_05770</i>         | 2.96 | conserved hypothetical protein                                                                    | R  | 0.008   |
| <i>CD630_33750 (mgtC)</i>  | 2.96 | Magnesium-transporting ATPase protein Tn916-like CTn7-Orf10                                       | S  | 0.003   |
| <i>CD630_21640 (ldh)</i>   | 2.95 | L-lactate dehydrogenase                                                                           | C  | 0.004   |
| <i>CD630_10540 (bcd2)</i>  | 2.94 | Butyryl-CoA dehydrogenase                                                                         | I  | 0.017   |
| <i>CD630_15470 (hisZ)</i>  | 2.92 | ATP phosphoribosyltransferase regulatory subunit                                                  | E  | 0.044   |
| <i>CD630_20140 (ilvD)</i>  | 2.90 | Dihydroxy-acid dehydratase                                                                        | EG | 7.2E-05 |
| <i>CD630_08570 (oppF)</i>  | 2.88 | Fragment of ABC-type transport system oligopeptide-family ATP-binding protein                     | -  | 0.029   |
| <i>CD630_15490 (hisC)</i>  | 2.86 | Histidinol-phosphate aminotransferase                                                             | E  | 0.047   |
| <i>CD630_15520 (hisA)</i>  | 2.80 | 1-(5-phosphoribosyl)-5-[(5-phosphoribosylamino)methylideneamino]imidazole-4-carboxamide isomerase | E  | 0.044   |
| <i>CD630_16590</i>         | 2.69 | Cation-transporting ATPase                                                                        | P  | 0.003   |
| <i>CD630_20270</i>         | 2.69 | N-carbamoyl-L-amino acid hydrolase                                                                | E  | 0.047   |
| <i>CD630_33911</i>         | 2.66 | conserved hypothetical protein                                                                    | -  | 0.021   |
| <i>CD630_16310 (sodA)</i>  | 2.59 | spore coat protein-superoxide dismutase (Mn)                                                      | P  | 0.007   |
| <i>CD630_03830</i>         | 2.58 | putative cell-division FtsK/SpolIIE-family protein Tn916-like CTn1-Orf28                          | D  | 0.009   |
| <i>CD630_10860</i>         | 2.54 | putative peptidase M20D family                                                                    | R  | 0.033   |
| <i>CD630_21930 (cwp24)</i> | 2.54 | putative cell wall-binding protein                                                                | -  | 0.047   |
| <i>CD630_20910</i>         | 2.49 | putative xanthine/uracil permease                                                                 | F  | 0.010   |
| <i>CD630_17880</i>         | 2.48 | putative membrane protein                                                                         | -  | 0.027   |
| <i>CD630_16740</i>         | 2.47 | putative NADPH-dependent FMN reductase                                                            | R  | 0.005   |
| <i>CD630_22330 (asrA)</i>  | 2.43 | Anaerobic sulfite reductase subunit A                                                             | C  | 0.043   |
| <i>CD630_17021 (thiS)</i>  | 2.41 | Thiamine biosynthesis protein                                                                     | H  | 0.011   |
| <i>CD630_20280 (racX)</i>  | 2.39 | putative aspartate racemase                                                                       | M  | 1.2E-04 |
| <i>CD630_27090</i>         | 2.37 | putative oxidoreductase                                                                           | I  | 0.010   |
| <i>CD630_09260</i>         | 2.36 | putative phage protein                                                                            | -  | 0.050   |
| <i>CD630_13900</i>         | 2.35 | conserved hypothetical protein DUF819 family                                                      | S  | 2.8E-06 |
| <i>CD630_21270</i>         | 2.34 | putative exported protein                                                                         | -  | 0.042   |
| <i>CD630_27840 (cwp6)</i>  | 2.30 | putative N-acetylmuramoyl-L-alanineamidase autolysin                                              | M  | 0.006   |
| <i>CD630_23090</i>         | 2.29 | conserved hypothetical protein                                                                    | -  | 0.014   |
| <i>CD630_04800 (spaG)</i>  | 2.29 | ABC-type transport system lantibiotic/multidrug-family permease                                   | S  | 0.037   |
| <i>CD630_04890</i>         | 2.26 | putative phosphoribosylaminoimidazole-succinocarb oxamide synthetase                              | F  | 0.001   |
| <i>CD630_17151</i>         | 2.24 | conserved hypothetical protein                                                                    | -  | 0.016   |
| <i>CD630_15100</i>         | 2.24 | conserved hypothetical protein                                                                    | -  | 0.006   |
| <i>CD630_07290 (gcvH)</i>  | 2.23 | Glycine cleavage system H protein                                                                 | E  | 0.044   |
| <i>CD630_20751</i>         | 2.21 | conserved hypothetical protein                                                                    | -  | 0.018   |
| <i>CD630_16130 (cotA)</i>  | 2.18 | spore coat assembly protein                                                                       | -  | 0.022   |
| <i>CD630_10980</i>         | 2.17 | Two-component sensor histidine kinase Tn1549-like CTn4-Orf27                                      | T  | 4.3E-04 |
| <i>CD630_10850</i>         | 2.17 | putative membrane protein                                                                         | E  | 0.015   |
| <i>CD630_15560</i>         | 2.16 | putative polysaccharide deacetylase                                                               | G  | 0.001   |
| <i>CD630_15120 (panC)</i>  | 2.15 | Pantothenate synthetase                                                                           | H  | 0.018   |
| <i>CD630_16200</i>         | 2.15 | Transporter Major Facilitator Superfamily (MFS)                                                   | G  | 2.6E-04 |
| <i>CD630_33790</i>         | 2.14 | putative conjugative transposon protein Tn916-like CTn7-Orf15                                     | -  | 0.006   |
| <i>CD630_29620</i>         | 2.13 | conserved hypothetical protein                                                                    | -  | 2.8E-04 |
| <i>CD630_04440 (ortB)</i>  | 2.09 | 2-amino-4-ketopentanoate thiolase beta subunit                                                    | E  | 0.013   |
| <i>CD630_17170</i>         | 2.07 | uncharacterised protein                                                                           | S  | 0.038   |
| <i>CD630_27250</i>         | 2.07 | putative monogalactosyldiacylglycerol synthase                                                    | M  | 0.020   |
| <i>CD630_25171</i>         | 2.04 | putative phage protein                                                                            | -  | 0.001   |
| <i>CD630_19440</i>         | 2.03 | Fragment of conserved hypothetical protein                                                        | -  | 1.4E-04 |
| <i>CD630_26820 (pfo)</i>   | 2.03 | Pyruvate-ferredoxin oxidoreductase                                                                | C  | 0.021   |
| <i>CD630_15660 (ilvB)</i>  | 2.01 | Acetolactate synthase large subunit                                                               | EH | 0.040   |
| <i>CD630_19670</i>         | 2.01 | uncharacterised protein                                                                           | -  | 2.3E-04 |

#### Reduced in LL-37

|                           |      |                                      |   |         |
|---------------------------|------|--------------------------------------|---|---------|
| <i>CD630_23310 (mtlD)</i> | 0.12 | Mannitol-1-phosphate 5-dehydrogenase | G | 4.4E-04 |
|---------------------------|------|--------------------------------------|---|---------|

|                              |      |                                                                                      |    |         |
|------------------------------|------|--------------------------------------------------------------------------------------|----|---------|
| CD630_26140                  | 0.12 | uncharacterised protein DegV family                                                  | S  | 0.004   |
| CD630_23320 ( <i>mtIF</i> )  | 0.12 | PTS system mannitol-specific EIIA component                                          | G  | 0.001   |
| CD630_23330 ( <i>mtIR</i> )  | 0.14 | Transcription antiterminator PTS operon regulator                                    | K  | 2.3E-04 |
| CD630_23340 ( <i>mtIA</i> )  | 0.15 | PTS system mannitol-specific IICB component                                          | G  | 2.1E-05 |
| CD630_19120 ( <i>eutA</i> )  | 0.20 | Ethanolamine reactivating factor for ammonialyase eutBC                              | E  | 0.018   |
| CD630_19150 ( <i>eutL</i> )  | 0.21 | Ethanolamine carboxysome structural protein                                          | E  | 0.003   |
| CD630_31750 ( <i>cggR</i> )  | 0.22 | Transcriptional regulator SorC family                                                | K  | 0.049   |
| CD630_01631                  | 0.22 | conserved hypothetical protein                                                       | -  | 4.8E-04 |
| CD630_09950 ( <i>serA</i> )  | 0.23 | putative D-3-phosphoglycerate dehydrogenase                                          | HE | 0.007   |
| CD630_24291                  | 0.23 | putative 4Fe-4S ferredoxin iron-sulfur binding domain protein                        | C  | 0.019   |
| CD630_09080                  | 0.23 | putative phage protein                                                               | -  | 7.7E-06 |
| CD630_09960                  | 0.24 | conserved hypothetical protein                                                       | S  | 0.008   |
| CD630_30270                  | 0.25 | PTS system glucose-like IIA component                                                | G  | 0.021   |
| CD630_19220 ( <i>eutN</i> )  | 0.25 | Ethanolamine carboxysome structural protein                                          | QC | 0.016   |
| CD630_20160                  | 0.26 | conserved hypothetical protein                                                       | -  | 0.034   |
| 23S_rRNA                     | 0.27 | 23S ribosomal RNA                                                                    | -  | 0.026   |
| CD630_09360                  | 0.28 | putative phage endodeoxyribonuclease RusA-like                                       | L  | 0.007   |
| CD630_29341                  | 0.29 | putative phage protein                                                               | -  | 0.049   |
| CD630_29470                  | 0.30 | putative phage protein                                                               | -  | 0.020   |
| CD630_29320                  | 0.30 | putative phage protein                                                               | -  | 0.035   |
| CD630_28780 ( <i>fhuD</i> )  | 0.30 | ABC-type transport system ferrichrome-specific extracellular solute-binding protein  | P  | 0.004   |
| CD630_14890 ( <i>metN</i> )  | 0.32 | ABC-type transport system methionine-specific ATP-binding protein                    | P  | 0.035   |
| CD630_14900 ( <i>met I</i> ) | 0.32 | ABC-type transport system methionine-specific permease                               | P  | 0.034   |
| CD630_16632                  | 0.32 | conserved hypothetical protein                                                       | -  | 0.018   |
| CD630_17452                  | 0.34 | conserved hypothetical protein                                                       | R  | 0.026   |
| CD630_21710                  | 0.34 | Fragment of putative sodium:dicarboxylate symporter                                  | -  | 0.009   |
| CD630_31360 ( <i>bglA7</i> ) | 0.35 | 6-phospho-beta-glucosidase                                                           | G  | 0.001   |
| CD630_26640 ( <i>murE</i> )  | 0.35 | UDP-N-acetylmuramyl-tripeptide synthetase                                            | M  | 2.4E-04 |
| CD630_28770 ( <i>fhuB</i> )  | 0.35 | ABC-type transport system ferrichrome-specific permease                              | P  | 1.5E-04 |
| CD630_36010                  | 0.35 | D-alanyl-D-alanine carboxypeptidase M15 family                                       | M  | 0.013   |
| CD630_31000                  | 0.36 | putative C4-dicarboxylate anaerobic carrier Dcu family                               | S  | 0.046   |
| CD630_18470                  | 0.36 | putative conjugative transposon protein Tn1549-like CTn5-Orf3                        | -  | 0.001   |
| CD630_31150 ( <i>bglA4</i> ) | 0.37 | 6-phospho-beta-glucosidase                                                           | G  | 0.003   |
| CD630_13610                  | 0.37 | putative phage protein                                                               | -  | 0.002   |
| CD630_32570                  | 0.37 | putative polysaccharide deacetylase                                                  | G  | 0.016   |
| CD630_30340                  | 0.38 | Transcriptional regulator TrmB family                                                | K  | 0.013   |
| CD630_27491                  | 0.38 | Autoinducer prepeptide                                                               | -  | 2.5E-05 |
| CD630_25150                  | 0.38 | putative L-aspartate-beta-decarboxylase                                              | E  | 0.043   |
| CD630_27640                  | 0.38 | putative hydrolase HAD superfamily IIB subfamily                                     | R  | 0.003   |
| CD630_26710                  | 0.38 | ABC-type transport system ATP-binding protein putative oligopeptide transport system | EP | 0.028   |
| CD630_33440                  | 0.39 | putative cell-division FtsK/SpolIIE-family protein Tn916-like CTn6-Orf22             | D  | 0.007   |
| CD630_09340                  | 0.39 | putative phage protein                                                               | -  | 0.007   |
| CD630_35370 ( <i>phnH</i> )  | 0.39 | putative phosphonate metabolism protein                                              | P  | 0.007   |
| CD630_31370 ( <i>bglF5</i> ) | 0.39 | PTS system beta-glucoside-specific IIAB component                                    | G  | 0.022   |
| CD630_30360                  | 0.39 | Transporter Major Facilitator Superfamily (MFS)                                      | E  | 0.022   |
| CD630_08450                  | 0.40 | putative nuclease                                                                    | -  | 0.034   |
| CD630_22010                  | 0.40 | Transporter Major Facilitator Superfamily (MFS)                                      | G  | 0.045   |
| CD630_25090                  | 0.40 | putative glycoside hydrolase family 4                                                | G  | 0.016   |
| CD630_23710 ( <i>nadB</i> )  | 0.40 | L-aspartate oxidase (Quinolinate synthetase B)                                       | H  | 4.3E-04 |
| CD630_23720 ( <i>nadA</i> )  | 0.40 | Quinolinate synthetase A                                                             | H  | 0.003   |
| CD630_13640                  | 0.40 | putative phage XkdM-like protein                                                     | -  | 0.001   |
| CD630_19180 ( <i>eutK</i> )  | 0.40 | Ethanolamine carboxysome structural protein                                          | QC | 0.039   |
| CD630_11540                  | 0.40 | Transcriptional regulator PadR family                                                | K  | 0.025   |
| CD630_03270 ( <i>cbiO</i> )  | 0.40 | ABC-type transport system cobalt-specific ATP-binding protein                        | P  | 0.003   |
| CD630_05790                  | 0.40 | Transcriptional regulator TetR family                                                | K  | 0.027   |
| CD630_30990                  | 0.40 | putative amidohydrolase M20D family                                                  | R  | 0.031   |

|                            |      |                                                                                      |     |         |
|----------------------------|------|--------------------------------------------------------------------------------------|-----|---------|
| <i>CD630_03260 (cbiQ1)</i> | 0.41 | ABC-type transport system cobalt-specific permease                                   | P   | 0.002   |
| <i>CD630_18860</i>         | 0.41 | Transcriptional regulator PadR family                                                | K   | 0.014   |
| <i>CD630_30720</i>         | 0.41 | conserved hypothetical protein                                                       | S   | 0.019   |
| <i>CD630_03140</i>         | 0.41 | putative membrane protein                                                            | S   | 0.018   |
| <i>CD630_26860</i>         | 0.41 | putative membrane protein                                                            | -   | 0.009   |
| <i>CD630_24620 (grpE)</i>  | 0.41 | HSP-70 cofactor                                                                      | O   | 4.5E-04 |
| <i>CD630_29420</i>         | 0.41 | putative phage resolvase/integrase                                                   | -   | 1.4E-04 |
| <i>CD630_11261</i>         | 0.42 | Transcriptional regulator HTH-type                                                   | K   | 0.004   |
| <i>CD630_29400</i>         | 0.42 | putative phage protein                                                               | -   | 0.043   |
| <i>CD630_17540</i>         | 0.42 | ABC-type transport system multidrug-family permease                                  | -   | 0.018   |
| <i>CD630_03240 (cbiM)</i>  | 0.42 | Cobalamin biosynthesis protein                                                       | P   | 0.009   |
| <i>CD630_23700 (nadC)</i>  | 0.42 | Nicotinate-nucleotide pyrophosphorylase                                              | H   | 0.002   |
| <i>CD630_06140</i>         | 0.43 | conserved hypothetical protein                                                       | -   | 0.027   |
| <i>CD630_26700</i>         | 0.43 | ABC-type transport system ATP-binding protein putative oligopeptide transport system | E   | 0.025   |
| <i>CD630_01060 (cwID)</i>  | 0.43 | Germination-specific N-acetylmuramoyl-L-alanineamidase Autolysin                     | M   | 0.009   |
| <i>CD630_26650</i>         | 0.43 | Transcriptional regulator AraC family                                                | K   | 0.014   |
| <i>CD630_03901</i>         | 0.43 | conserved hypothetical protein                                                       | -   | 0.021   |
| <i>CD630_25160 (ansB)</i>  | 0.44 | L-asparaginase                                                                       | EJ  | 0.034   |
| <i>CD630_29360</i>         | 0.44 | putative phage protein                                                               | -   | 0.007   |
| <i>CD630_05670</i>         | 0.44 | uncharacterised protein DegV family                                                  | S   | 0.033   |
| <i>CD630_01250</i>         | 0.44 | putative cell wall endopeptidase                                                     | M   | 0.046   |
| <i>CD630_04090</i>         | 0.44 | putative replication initiation protein Tn1549-like CTn2-Orf2                        | -   | 0.029   |
| <i>CD630_29440</i>         | 0.44 | putative phage essential recombination functionprotein                               | -   | 0.040   |
| <i>CD630_12700</i>         | 0.45 | Two-component sensor histidine kinase                                                | T   | 0.001   |
| <i>CD630_30260</i>         | 0.45 | conserved hypothetical protein                                                       | TK  | 0.005   |
| <i>CD630_11710 (etfB4)</i> | 0.45 | Electron transfer flavoprotein subunit alpha                                         | C   | 0.008   |
| <i>CD630_29430</i>         | 0.45 | putative phage replication protein                                                   | L   | 0.010   |
| <i>CD630_09170</i>         | 0.45 | putative phage recombination protein Bet                                             | -   | 6.1E-05 |
| <i>CD630_06240</i>         | 0.45 | putative transcriptional regulator activator                                         | S   | 0.003   |
| <i>CD630_29710 (bioY)</i>  | 0.45 | Biotin synthase                                                                      | R   | 0.012   |
| <i>CD630_01930 (groS)</i>  | 0.46 | chaperonin                                                                           | O   | 0.003   |
| <i>CD630_20451</i>         | 0.46 | conserved hypothetical protein                                                       | -   | 1.9E-04 |
| <i>CD630_13450</i>         | 0.46 | Transcriptional regulator PadR family                                                | K   | 0.002   |
| <i>CD630_26870</i>         | 0.46 | conserved hypothetical protein                                                       | -   | 0.007   |
| <i>CD630_29490</i>         | 0.46 | Transcriptional regulator Phage-type                                                 | -   | 0.005   |
| <i>CD630_05780</i>         | 0.47 | Transporter Major Facilitator Superfamily (MFS)                                      | -   | 0.004   |
| <i>CD630_18270</i>         | 0.47 | Transcriptional regulator MarR family                                                | K   | 0.033   |
| <i>CD630_30250</i>         | 0.47 | putative ferredoxin iron-sulphur domain-containing protein                           | C   | 0.007   |
| <i>CD630_32090</i>         | 0.47 | Transcriptional regulator PadR family                                                | K   | 0.006   |
| <i>CD630_00470 (ispD)</i>  | 0.48 | 2-C-methyl-D-erythritol 4-phosphatecytidyltransferase                                | I   | 0.029   |
| <i>CD630_21430</i>         | 0.48 | Transcriptional regulator HTH-type                                                   | -   | 0.020   |
| <i>CD630_24610 (dnaK)</i>  | 0.48 | Chaperone protein dnaK (Heat shock protein 70)                                       | O   | 0.009   |
| <i>CD630_25110</i>         | 0.48 | Transcription antiterminator PTS operon regulator                                    | K   | 0.026   |
| <i>CD630_32100</i>         | 0.48 | conserved hypothetical protein                                                       | E   | 0.030   |
| <i>CD630_32620 (pstA)</i>  | 0.48 | ABC-type transport system phosphate-specific permease                                | P   | 0.045   |
| <i>CD630_25100</i>         | 0.48 | PTS system glucose-like IIBC component                                               | G   | 0.043   |
| <i>CD630_27880</i>         | 0.48 | putative membrane protein GtrA family                                                | S   | 0.004   |
| <i>CD630_13720</i>         | 0.48 | putative phage XkdT-like protein                                                     | -   | 2.2E-06 |
| <i>CD630_19210</i>         | 0.48 | putative ethanolamine utilization protein                                            | -   | 0.017   |
| <i>CD630_10280</i>         | 0.48 | putative signaling protein                                                           | TK  | 0.030   |
| <i>CD630_21510</i>         | 0.48 | putative membrane protein DUF819 family                                              | S   | 0.006   |
| <i>CD630_23300 (xpt)</i>   | 0.49 | Xanthine phosphoribosyltransferase (XPRTase)                                         | F   | 0.036   |
| <i>CD630_15800 (hom2)</i>  | 0.49 | Homoserine dehydrogenase                                                             | E   | 0.010   |
| <i>CD630_24630 (hrcA)</i>  | 0.49 | Transcriptional regulator Heat-inducibler epressor                                   | K   | 0.013   |
| <i>CD630_32220 (sdaB)</i>  | 0.49 | L-serine dehydratase                                                                 | E   | 0.005   |
| <i>CD630_27500 (agrB)</i>  | 0.49 | Accessory gene regulator                                                             | OTK | 0.001   |
| <i>CD630_32600 (phoU)</i>  | 0.49 | Phosphate uptake regulator                                                           | P   | 0.001   |
| <i>CD630_13460</i>         | 0.50 | conserved hypothetical protein DUF1700                                               | S   | 0.002   |

|                           |      |                                                                                |   |       |
|---------------------------|------|--------------------------------------------------------------------------------|---|-------|
| <i>CD630_26691</i>        | 0.50 | putative Na(+)/H(+) antiporter                                                 | P | 0.009 |
| <i>CD630_29330</i>        | 0.50 | Hypothetical protein                                                           | J | 0.010 |
| <i>CD630_03250 (cbiN)</i> | 0.50 | ABC-type transport system cobalt-specific extracellular solute-binding protein | P | 0.031 |

<sup>a</sup>Gene accession numbers are given for strain 630.

<sup>b</sup>Ratio of no LL-37/with LL-37 as determined by RNA sequencing analysis of 630 $\Delta$ *erm* grown in BHIS alone or BHIS supplemented with 2  $\mu$ g/ml LL-37 as described in Methods. Genes are included in this list if they had  $\geq$  2-fold increase or decrease in expression and a *P* value  $\leq$  0.05 by Student's two-tailed *t*-test.

<sup>c</sup>COG (classification of gene) designations are based on the 2014 COG database. Letter designations correspond to the categories listed in the table below.

<sup>d</sup>*P*-values determined by Student's two-tailed *t*-test.

|   |                                                                        |
|---|------------------------------------------------------------------------|
| A | RNA processing and modification                                        |
| B | Chromatin Structure and dynamics                                       |
| C | Energy production and conversion                                       |
| D | Cell cycle control and mitosis                                         |
| E | Amino Acid metabolism and transport                                    |
| F | Nucleotide metabolism and transport                                    |
| G | Carbohydrate metabolism and transport                                  |
| H | Coenzyme metabolism                                                    |
| I | Lipid metabolism                                                       |
| J | Translation                                                            |
| K | Transcription                                                          |
| L | Replication and repair                                                 |
| M | Cell wall/membrane/envelop biogenesis                                  |
| N | Cell motility                                                          |
| O | Post-translational modification, protein turnover, chaperone functions |
| P | Inorganic ion transport and metabolism                                 |
| Q | Secondary Structure                                                    |
| T | Signal Transduction                                                    |
| U | Intracellular trafficking and secretion                                |
| Y | Nuclear structure                                                      |
| Z | Cytoskeleton                                                           |
| R | General Functional Prediction only                                     |
| S | Function Unknown                                                       |
| - | Unassigned                                                             |

**Table S2. LL-37 MIC and MBC values for *clinR* and *clinAB* mutants**

|                         | MIC <sup>a</sup> | MBC <sup>b</sup> |
|-------------------------|------------------|------------------|
| 630 $\Delta$ <i>erm</i> | 15               | 20               |
| <i>clinR</i>            | 15               | 30               |
| <i>clinAB</i>           | 15               | 20               |

<sup>a</sup> Minimum inhibitory concentration of LL-37 ( $\mu$ g/ml).

<sup>b</sup> Minimum bactericidal concentration of LL-37 ( $\mu$ g/ml).

**Table S3. MIC values for *clnR* and *clnAB* mutants in various antimicrobials**

|                         | Van <sup>a</sup> | Amp | PmB | Nis |
|-------------------------|------------------|-----|-----|-----|
| 630 $\Delta$ <i>erm</i> | 1                | 4   | 500 | 360 |
| <i>clnR</i>             | 1                | 4   | 500 | 360 |
| <i>clnAB</i>            | 1                | 4   | 500 | 360 |

<sup>a</sup>Values shown are  $\mu\text{g/ml}$ . Van: vancomycin, Amp: ampicillin, PmB: polymyxin B, Nis: nisin.

**Table S4. Genes differentially expressed in a *clnR* mutant in the presence/absence of LL-37**

| Gene <sup>a</sup>                     | <i>clnR</i> /<br>WT <sup>b</sup> | Product                                                         | COG <sup>c</sup> | <i>p</i> <sup>d</sup> |
|---------------------------------------|----------------------------------|-----------------------------------------------------------------|------------------|-----------------------|
| <b>ClnR activates (without LL-37)</b> |                                  |                                                                 |                  |                       |
| <i>CD630_16632</i>                    | 0.22                             | conserved hypothetical protein                                  | -                | 0.003                 |
| <i>CD630_23030</i>                    | 0.22                             | Fragment of putative phage transcriptional repressor            | -                | 0.003                 |
| <i>CD630_35370 (phnH)</i>             | 0.22                             | putative phosphonate metabolism protein                         | P                | 9.0E-05               |
| <i>CD630_19280</i>                    | 0.22                             | putative membrane protein                                       | D                | 9.0E-05               |
| <i>CD630_29341</i>                    | 0.23                             | putative phage protein                                          | -                | 0.009                 |
| <i>CD630_01631</i>                    | 0.24                             | conserved hypothetical protein                                  | -                | 0.013                 |
| <i>CD630_13700</i>                    | 0.25                             | putative phage XkdS-like protein                                | -                | 0.018                 |
| <i>CD630_32770</i>                    | 0.26                             | PTS system mannose/fructose/sorbose IIC component               | G                | 0.004                 |
| <i>CD630_29330</i>                    | 0.32                             | Hypothetical protein                                            | J                | 0.005                 |
| <i>CD630_04090</i>                    | 0.33                             | putative replication initiation protein Tn1549-like CTn2-Orf2   | -                | 0.032                 |
| <i>CD630_00410</i>                    | 0.33                             | PTS system galactitol-specific IIA component                    | GT               | 2.7E-04               |
| <i>CD630_11980 (spolIIAG)</i>         | 0.33                             | Stage III sporulation protein AG                                | -                | 0.001                 |
| <i>CD630_07400</i>                    | 0.35                             | putative pyridoxal phosphate-dependent aminotransferase         | E                | 0.008                 |
| <i>CD630_07420</i>                    | 0.37                             | putative ethanolamine transporter                               | E                | 0.003                 |
| <i>CD630_36361</i>                    | 0.38                             | conserved hypothetical protein                                  | -                | 0.015                 |
| <i>CD630_29370</i>                    | 0.39                             | putative phage protein                                          | -                | 0.011                 |
| <i>CD630_01350</i>                    | 0.41                             | PTS system lactose/cellobiose-family IIA component              | G                | 0.032                 |
| <i>CD630_23260</i>                    | 0.41                             | PTS system fructose/mannitol family IIBc component              | G                | 0.001                 |
| <i>CD630_24170</i>                    | 0.42                             | PTS system Sorbitol-like IIB component                          | G                | 0.003                 |
| <i>CD630_26870</i>                    | 0.43                             | conserved hypothetical protein                                  | -                | 0.002                 |
| <i>CD630_01981</i>                    | 0.43                             | conserved hypothetical protein                                  | -                | 0.042                 |
| <i>CD630_02850</i>                    | 0.44                             | PTS system mannose/fructose/sorbose IIB component               | G                | 0.001                 |
| <i>CD630_29490</i>                    | 0.44                             | Transcriptional regulator Phage-type                            | -                | 3.1E-04               |
| <i>CD630_13630</i>                    | 0.45                             | putative phage XkdK-like protein                                | -                | 0.016                 |
| <i>CD630_29360</i>                    | 0.45                             | putative phage protein                                          | -                | 0.009                 |
| <i>CD630_16490</i>                    | 0.45                             | ABC-type transport system iron-family ATP-binding protein       | P                | 0.022                 |
| <i>CD630_21970</i>                    | 0.46                             | putative ferredoxin/ferredoxin oxidoreductase                   | C                | 0.017                 |
| <i>CD630_12332</i>                    | 0.46                             | conserved hypothetical protein                                  | -                | 0.034                 |
| <i>CD630_26570</i>                    | 0.49                             | conserved hypothetical protein                                  | -                | 0.006                 |
| <i>CD630_04200</i>                    | 0.49                             | putative cell surface protein Tn1549-like CTn2-Orf15            | R                | 0.006                 |
| <i>CD630_21021</i>                    | 0.49                             | conserved hypothetical protein                                  | -                | 0.006                 |
| <i>CD630_04880 (orr)</i>              | 0.50                             | putative small multidrug resistance SugE-like protein           | P                | 0.041                 |
| <b>ClnR represses (without LL-37)</b> |                                  |                                                                 |                  |                       |
| <i>CD630_16180 (clnA)</i>             | 57.26                            | ABC-type transport system multidrug-family ATP-binding protein  | V                | 0.021                 |
| <i>CD630_16190 (clnB)</i>             | 53.69                            | ABC-type transport system multidrug-family permease             | -                | 0.001                 |
| <i>CD630_12400 (vanZ)</i>             | 21.50                            | Teicoplanin resistance protein                                  | V                | 0.017                 |
| <i>CD630_33370</i>                    | 3.37                             | putative membrane protein Tn916-like CTn6-Orf14                 | B                | 0.006                 |
| <i>CD630_07970</i>                    | 2.96                             | putative pyruvate carboxyltransferase                           | E                | 0.014                 |
| <i>CD630_16310 (sodA)</i>             | 2.70                             | spore coat protein-superoxide dismutase                         | P                | 4.3E-04               |
| <i>CD630_01820</i>                    | 2.47                             | conserved hypothetical protein                                  | -                | 0.017                 |
| <i>CD630_18840</i>                    | 2.43                             | conserved hypothetical protein                                  | -                | 0.042                 |
| <i>CD630_22180 (int2)</i>             | 2.43                             | Fragment of putative integrase                                  | -                | 0.042                 |
| <i>CD630_03710</i>                    | 2.43                             | putative conjugative transposon protein Tn916-like CTn1-Orf16   | -                | 0.042                 |
| <i>CD630_15111</i>                    | 2.26                             | conserved hypothetical protein                                  | -                | 0.037                 |
| <i>CD630_16680</i>                    | 2.13                             | putative membrane protein                                       | -                | 3.4E-06               |
| <i>CD630_27340</i>                    | 2.09                             | putative Na <sup>+</sup> /H <sup>+</sup> antiporter NhaC family | C                | 0.001                 |
| <i>CD630_12450</i>                    | 2.08                             | conserved hypothetical protein                                  | -                | 0.032                 |
| <b>ClnR activates (with LL-37)</b>    |                                  |                                                                 |                  |                       |
| <i>CD630_23540 (grdE)</i>             | 0.06                             | Betaine reductase component B subunit                           | -                | 0.001                 |
| <i>CD630_23520 (grdA)</i>             | 0.07                             | Glycine reductase complex selenoprotein A (selenocysteine)      | -                | 1.5E-04               |
| <i>CD630_02850</i>                    | 0.07                             | PTS system mannose/fructose/sorbose IIB component               | G                | 0.002                 |
| <i>CD630_02840</i>                    | 0.08                             | PTS system mannose/fructose/sorbose IIA component               | G                | 0.005                 |
| <i>CD630_23550 (trxA2)</i>            | 0.09                             | Thioredoxin 2                                                   | O                | 0.005                 |
| <i>CD630_23260</i>                    | 0.09                             | PTS system fructose/mannitol family IIB component               | G                | 0.008                 |
| <i>CD630_02880</i>                    | 0.10                             | PTS system mannose/fructose/sorbose IIC component               | G                | 3.3E-04               |
| <i>CD630_16080</i>                    | 0.13                             | ABC-type transport system multidrug-family permease             | -                | 0.003                 |



|                              |      |                                                                         |    |         |
|------------------------------|------|-------------------------------------------------------------------------|----|---------|
| CD630_02890                  | 0.13 | PTS system mannose/fructose/sorbose IID component                       | G  | 0.002   |
| CD630_02860                  | 0.13 | PTS system mannose/fructose/sorbose IIA component                       | G  | 0.014   |
| CD630_16060                  | 0.13 | Transcriptional regulator GntR family                                   | K  | 0.001   |
| CD630_16100                  | 0.13 | conserved hypothetical protein                                          | -  | 0.001   |
| CD630_16110                  | 0.14 | conserved hypothetical protein                                          | -  | 0.003   |
| CD630_02870                  | 0.14 | PTS system mannose/fructose/sorbose IIB component                       | G  | 0.002   |
| CD630_23570 ( <i>grdX</i> )  | 0.14 | putative glycine reductase complex component                            | -  | 0.017   |
| CD630_16090                  | 0.15 | conserved hypothetical protein                                          | -  | 0.004   |
| CD630_23560 ( <i>trxB3</i> ) | 0.15 | Thioredoxin reductase 3                                                 | O  | 0.018   |
| CD630_23490 ( <i>grdC</i> )  | 0.16 | Glycine reductase complex component C                                   | I  | 0.007   |
| CD630_16070                  | 0.16 | ABC-type transport system multidrug-family ATP-binding protein          | V  | 0.003   |
| CD630_20751                  | 0.18 | conserved hypothetical protein                                          | -  | 0.002   |
| CD630_29290                  | 0.18 | putative phage protein                                                  | -  | 0.004   |
| CD630_04200                  | 0.20 | putative cell surface protein Tn1549-like CTn2-Orf15                    | R  | 0.001   |
| CD630_23240                  | 0.21 | putative sugar-phosphate dehydrogenase                                  | ER | 0.050   |
| CD630_33740                  | 0.21 | putative conjugative transposon protein Tn916-like CTn7-Orf8            | -  | 6.2E-05 |
| CD630_23030                  | 0.21 | Fragment of putative phage transcriptional repressor                    | -  | 0.006   |
| CD630_26000 ( <i>cstA</i> )  | 0.22 | Carbon starvation protein                                               | T  | 1.4E-05 |
| CD630_23810 ( <i>iorA</i> )  | 0.22 | Indole pyruvate ferredoxin/ flavodoxin oxidoreductase                   | C  | 8.8E-05 |
| CD630_04670                  | 0.24 | putative hydrolase HAD superfamily subfamily IIB                        | HR | 0.001   |
| CD630_23800 ( <i>iorB</i> )  | 0.24 | Indole pyruvate ferredoxin/ flavodoxin oxidoreductase                   | C  | 4.0E-04 |
| CD630_25990                  | 0.24 | putative transcriptional regulator                                      | J  | 0.040   |
| CD630_02900                  | 0.25 | conserved hypothetical protein                                          | -  | 0.002   |
| CD630_23820                  | 0.26 | putative pyridoxal phosphate-dependent transferase                      | E  | 0.002   |
| CD630_29410                  | 0.27 | putative phage single-strand DNA-binding protein                        | L  | 0.037   |
| CD630_16180 ( <i>clnA</i> )  | 0.27 | ABC-type transport system multidrug-family ATP-binding protein          | V  | 0.005   |
| CD630_33750 ( <i>mgtC</i> )  | 0.27 | Magnesium-transporting ATPase protein Tn916-like CTn7-Orf10             | S  | 0.002   |
| CD630_16190 ( <i>clnB</i> )  | 0.27 | ABC-type transport system multidrug-family permease                     | -  | 0.011   |
| CD630_33730 ( <i>mgtA</i> )  | 0.27 | Magnesium-transporting ATPase P-type Tn916-like CTn7-Orf7               | P  | 0.001   |
| CD630_00330                  | 0.28 | putative glycoside hydrolase                                            | G  | 0.048   |
| CD630_07400                  | 0.28 | putative pyridoxal phosphate-dependent aminotransferase                 | E  | 0.045   |
| CD630_05490                  | 0.28 | conserved hypothetical protein                                          | -  | 0.001   |
| CD630_33741                  | 0.29 | putative conjugative transposon protein Tn916-like CTn7-Orf9            | -  | 0.002   |
| CD630_28130 ( <i>garR</i> )  | 0.30 | Tartronate semialdehyde reductase                                       | I  | 0.042   |
| CD630_29370                  | 0.31 | putative phage protein                                                  | -  | 0.001   |
| CD630_00220 ( <i>fusA1</i> ) | 0.31 | Elongation factor G                                                     | J  | 0.013   |
| CD630_18570                  | 0.31 | putative cell wall hydrolase Tn1549-like CTn5-Orf13                     | M  | 0.038   |
| CD630_18880 ( <i>rsiU</i> )  | 0.32 | Extracytoplasmic function (ECF) anti-sigma factor                       | -  | 0.004   |
| CD630_05000                  | 0.32 | putative antirestriction protein Tn5397 CTn3-Orf18                      | V  | 0.006   |
| CD630_17970                  | 0.34 | Coenzyme A disulfide reductase                                          | R  | 0.037   |
| CD630_01350                  | 0.34 | PTS system lactose/cellobiose-family IIA component                      | G  | 0.048   |
| CD630_04960                  | 0.34 | putative conjugative transposon protein DUF961 family Tn5397 CTn3-Orf23 | -  | 0.007   |
| CD630_23480 ( <i>grdD</i> )  | 0.34 | Glycine reductase complex component C                                   | I  | 0.015   |
| CD630_04980                  | 0.34 | putative cell-division FtsK/SpolIII-family protein Tn5397 CTn3-Orf21    | D  | 0.001   |
| CD630_17000 ( <i>ribD</i> )  | 0.35 | Riboflavin biosynthesis protein                                         | H  | 0.014   |
| CD630_28620                  | 0.36 | putative peptidase M19 family                                           | E  | 0.016   |
| CD630_18560                  | 0.36 | putative hydrolase Tn1549-like CTn5-Orf12                               | U  | 0.002   |
| CD630_15970                  | 0.36 | conserved hypothetical protein                                          | -  | 3.0E-04 |
| CD630_28240                  | 0.36 | Fragment of putative membrane protein                                   | -  | 0.020   |
| CD630_33721                  | 0.36 | putative conjugative transposon protein Tn916-like CTn7-Orf5            | -  | 0.004   |
| CD630_04970                  | 0.36 | putative conjugative transposon protein DUF961 family Tn5397 CTn3-Orf22 | -  | 0.008   |
| CD630_05103                  | 0.37 | putative conjugative transposon protein Tn5397 CTn3-Orf4                | -  | 0.013   |
| CD630_04990                  | 0.38 | putative replication initiation factor Tn5397 CTn3-Orf20                | L  | 0.001   |
| CD630_22820                  | 0.39 | PTS system fructose/mannitol family IIA component                       | GT | 0.024   |
| CD630_04991                  | 0.39 | putative conjugative transposon protein Tn5397 CTn3-Orf19               | -  | 0.005   |
| CD630_02910                  | 0.40 | putative peptidase M20A family                                          | E  | 0.009   |
| CD630_16980 ( <i>ribBA</i> ) | 0.40 | GTP cyclohydrolase-2 Riboflavin biosynthesis protein                    | H  | 0.012   |
| CD630_05100                  | 0.40 | putative RNA polymerase sigma factor Tn5397 CTn3-Orf7                   | K  | 0.001   |
| CD630_17960                  | 0.40 | putative nitrite and sulfite reductase subunit                          | C  | 0.044   |

|                              |      |                                                                      |    |         |
|------------------------------|------|----------------------------------------------------------------------|----|---------|
| CD630_05102                  | 0.40 | Fragment of putative conjugative transposon protein Tn5397 CTn3-Orf5 | -  | 0.002   |
| CD630_05060                  | 0.41 | Reverse transcriptase/maturase/endonuclease Group II intron          | V  | 0.001   |
| CD630_33722                  | 0.41 | putative conjugative transposon protein Tn916-like CTn7-Orf6         | -  | 0.002   |
| CD630_23790 ( <i>buk2</i> )  | 0.41 | Butyrate kinase                                                      | C  | 2.5E-04 |
| CD630_18870 ( <i>csfU</i> )  | 0.41 | Extracytoplasmic function (ECF) sigma factor                         | K  | 0.001   |
| CD630_28280                  | 0.41 | putative pyridoxal phosphate-dependent transferase                   | E  | 0.029   |
| CD630_05101                  | 0.41 | putative conjugative transposon protein Tn5397 CTn3-Orf8             | -  | 1.6E-04 |
| CD630_07390                  | 0.42 | putative exported protein                                            | -  | 1.0E-04 |
| CD630_15431                  | 0.43 | conserved hypothetical protein                                       | -  | 0.015   |
| CD630_20750 ( <i>pbuX</i> )  | 0.43 | putative xanthine permease                                           | F  | 0.001   |
| CD630_28110                  | 0.43 | conserved hypothetical protein                                       | S  | 0.010   |
| CD630_08650                  | 0.44 | putative ADP-ribose binding protein                                  | R  | 0.013   |
| CD630_06790                  | 0.45 | conserved hypothetical protein                                       | R  | 0.018   |
| CD630_04890                  | 0.45 | putative phosphoribosylaminoimidazole-succinocarboxamide synthetase  | F  | 0.001   |
| CD630_23590                  | 0.46 | putative hydrolase HAD superfamily subfamily IIB                     | R  | 2.9E-04 |
| CD630_28590                  | 0.46 | putative D-aminoacylase                                              | Q  | 0.018   |
| CD630_18890                  | 0.47 | ABC-type transport system multidrug-family ATP-binding protein       | V  | 0.004   |
| CD630_06770 ( <i>csfT</i> )  | 0.47 | Extracytoplasmic function (ECF) sigma factor                         | K  | 0.001   |
| CD630_21600                  | 0.47 | putative membrane protein                                            | V  | 0.019   |
| CD630_16220                  | 0.47 | peptidase propeptide and ypeb domain protein                         | S  | 0.034   |
| CD630_24020                  | 0.47 | putative cell wall hydrolase phosphatase-associated protein          | M  | 0.008   |
| CD630_18900                  | 0.47 | ABC-type transport system multidrug-family permease                  | O  | 0.007   |
| CD630_04400 ( <i>cwp27</i> ) | 0.47 | putative cell wall binding protein                                   | -  | 8.9E-05 |
| CD630_29490                  | 0.48 | Transcriptional regulator Phage-type                                 | -  | 0.004   |
| CD630_27080 ( <i>aroE2</i> ) | 0.48 | Shikimate dehydrogenase 2                                            | E  | 8.6E-05 |
| CD630_09370                  | 0.48 | putative phage anti-repressor                                        | K  | 0.012   |
| CD630_25670                  | 0.49 | PTS system mannose-specific IIB component                            | G  | 0.009   |
| CD630_05020                  | 0.49 | putative ATPase Tn5397 CTn3-Orf16                                    | L  | 0.002   |
| CD630_29300                  | 0.49 | putative phage anti-repressor protein                                | K  | 0.012   |
| CD630_27840 ( <i>cwp6</i> )  | 0.49 | putative N-acetylmuramoyl-L-alanineamidase autolysin                 | M  | 0.002   |
| CD630_01420                  | 0.49 | putative RNA-binding protein                                         | J  | 0.028   |
| CD630_22490                  | 0.50 | putative ATPase                                                      | R  | 0.001   |
| CD630_21910                  | 0.50 | putative phosphoesterase                                             | ER | 0.008   |
| CD630_23090                  | 0.50 | conserved hypothetical protein                                       | -  | 0.039   |

### ClnR represses (with LL-37)

|                                |      |                                                                                       |    |         |
|--------------------------------|------|---------------------------------------------------------------------------------------|----|---------|
| CD630_26140                    | 7.62 | uncharacterised protein DegV family                                                   | S  | 0.017   |
| CD630_06680                    | 4.19 | Two-component response regulator                                                      | K  | 0.014   |
| CD630_06690                    | 4.01 | Two-component sensor histidine kinase                                                 | T  | 0.011   |
| CD630_27491 ( <i>agrD</i> )    | 3.46 | Autoinducer prepeptide                                                                | -  | 0.002   |
| CD630_11920                    | 3.10 | Stage III sporulation protein AA                                                      | S  | 0.039   |
| CD630_24291                    | 3.10 | putative 4Fe-4S ferredoxin iron-sulfur binding domain protein                         | C  | 0.039   |
| CD630_28370                    | 2.74 | putative membrane protein                                                             | S  | 0.046   |
| CD630_04370                    | 2.74 | Fragment of integrase Tn1549-like CTn2                                                | -  | 0.046   |
| CD630_09780                    | 2.52 | Transcriptional regulator beta-lactams repressor Phage-type                           | -  | 0.011   |
| CD630_22290                    | 2.49 | putative membrane protein                                                             | S  | 0.049   |
| CD630_10950                    | 2.48 | ABC-type transport system multidrug-family permease Tn1549-like CTn4-Orf30            | -  | 0.030   |
| CD630_25150                    | 2.45 | putative L-aspartate-beta-decarboxylase                                               | E  | 0.039   |
| CD630_04640                    | 2.45 | putative beta-lactamase-like hydrolase                                                | R  | 0.018   |
| CD630_26640 ( <i>murE</i> )    | 2.42 | UDP-N-acetylmuramyl-tripeptide synthetase                                             | M  | 0.009   |
| CD630_09950 ( <i>serA</i> )    | 2.40 | putative D-3-phosphoglycerate dehydrogenase                                           | HE | 0.019   |
| CD630_09960                    | 2.34 | conserved hypothetical protein                                                        | S  | 0.015   |
| CD630_21510                    | 2.34 | putative membrane protein DUF819 family                                               | S  | 0.007   |
| CD630_33360                    | 2.32 | putative cell wall hydrolase Tn916-like CTn6-Orf13                                    | M  | 5.0E-04 |
| CD630_01260 ( <i>spolIID</i> ) | 2.29 | Stage III sporulation protein D                                                       | -  | 0.002   |
| CD630_30730                    | 2.24 | putative membrane protein                                                             | -  | 0.008   |
| CD630_10970                    | 2.22 | ABC-type transport system multidrug-family ATP-binding protein Tn1549-like CTn4-Orf28 | V  | 0.008   |
| CD630_25290                    | 2.18 | conserved hypothetical protein                                                        | -  | 0.021   |
| CD630_21710                    | 2.18 | Fragment of putative sodium:dicarboxylate symporter                                   | -  | 0.036   |

|                           |      |                                                                                      |   |         |
|---------------------------|------|--------------------------------------------------------------------------------------|---|---------|
| <i>CD630_08220</i>        | 2.11 | ABC-type transport system multidrug-family ATP-binding protein                       | V | 0.016   |
| <i>CD630_26700</i>        | 2.10 | ABC-type transport system ATP-binding protein putative oligopeptide transport system | E | 0.031   |
| <i>CD630_25940 (uraA)</i> | 2.10 | ABC-type transport system uracil-specific permease                                   | F | 4.5E-04 |
| <i>CD630_08230</i>        | 2.05 | ABC-type transport system multidrug-family permease                                  | - | 0.042   |
| <i>CD630_30230</i>        | 2.03 | conserved hypothetical protein                                                       | - | 0.034   |
| <i>CD630_23750</i>        | 2.03 | uncharacterised protein                                                              | - | 0.022   |

<sup>a</sup>Gene accession numbers are given for strain 630. Gene *CD630\_20072 (ermB)* is excluded from these tables because it is an artifact of the insertional disruption used to generate the *clnR* mutant.

<sup>b</sup>Ratio of expression in *clnR* mutant/630 $\Delta$ *erm*, as determined by RNA sequencing analysis of 630 $\Delta$ *erm* and *clnR* grown in BHIS alone or BHIS supplemented with 2  $\mu$ g/ml LL-37 as described in Methods. Fold-change represents the ratio of expression in *clnR*/630 $\Delta$ *erm* in the condition indicated (with or without LL-37). Genes are included in this list if they had  $\geq 2$ -fold increase or decrease in expression and a *p* value  $\leq 0.05$  by Student's two-tailed *t*-test.

<sup>c</sup>COG designations are based on the 2014 COG database. Letter designations correspond to the categories listed in the table associated with Table S1.

<sup>d</sup>*p* values determined by Student's two-tailed *t*-test.

**Table S5. Genes regulated by both ClnR and LL-37**

| Gene <sup>a</sup>         | Fold change<br>in LL-37 <sup>b</sup> | <i>clnR</i> /WT <sup>c</sup> | <i>clnR</i> /WT<br>(+ LL-37) <sup>d</sup> | Product                                                                 |
|---------------------------|--------------------------------------|------------------------------|-------------------------------------------|-------------------------------------------------------------------------|
| <i>CD630_01631</i>        | 0.22                                 | 0.24                         | 1.63                                      | spore coat protein-superoxide dismutase                                 |
| <i>CD630_02910</i>        | 3.25                                 | 1.32                         | 0.40                                      | putative peptidase M20A family                                          |
| <i>CD630_04090</i>        | 0.44                                 | 0.33                         | 0.87                                      | putative replication initiation protein Tn1549-like CTn2-Orf2           |
| <i>CD630_04670</i>        | 3.43                                 | 1.44                         | 0.24                                      | putative hydrolase HAD superfamily subfamily IIB                        |
| <i>CD630_04890</i>        | 2.26                                 | 1.04                         | 0.45                                      | putative phosphoribosylaminoimidazole-succinocarboxamide synthetase     |
| <i>CD630_04960</i>        | 4.13                                 | 1.19                         | 0.34                                      | putative conjugative transposon protein DUF961 family Tn5397 CTn3-Orf23 |
| <i>CD630_04970</i>        | 3.86                                 | 0.93                         | 0.36                                      | putative conjugative transposon protein DUF961 family Tn5397 CTn3-Orf22 |
| <i>CD630_04980</i>        | 4.13                                 | 0.93                         | 0.34                                      | putative cell-division FtsK/SpoIIIE-family protein Tn5397 CTn3-Orf21    |
| <i>CD630_05000</i>        | 3.61                                 | 1.08                         | 0.32                                      | putative antirestriction protein Tn5397 CTn3-Orf18                      |
| <i>CD630_05060</i>        | 3.54                                 | 0.97                         | 0.41                                      | Reverse transcriptase/maturase/endonuclease Group II intron             |
| <i>CD630_05100</i>        | 3.07                                 | 0.79                         | 0.40                                      | putative RNA polymerase sigma factor Tn5397 CTn3-Orf7                   |
| <i>CD630_05101</i>        | 3.31                                 | 1.05                         | 0.41                                      | putative conjugative transposon protein Tn5397 CTn3-Orf8                |
| <i>CD630_05102</i>        | 3.35                                 | 0.89                         | 0.40                                      | Fragment of putative conjugative transposon protein Tn5397 CTn3-Orf5    |
| <i>CD630_05103</i>        | 3.27                                 | 1.06                         | 0.37                                      | putative conjugative transposon protein Tn5397 CTn3-Orf4                |
| <i>CD630_05490</i>        | 4.74                                 | 1.15                         | 0.28                                      | conserved hypothetical protein                                          |
| <i>CD630_05500</i>        | 5.52                                 | 0.81                         | 0.53                                      | putative membrane protein                                               |
| <i>CD630_09950 (serA)</i> | 0.23                                 | 1.14                         | 2.40                                      | putative D-3-phosphoglycerate dehydrogenase                             |
| <i>CD630_09960</i>        | 0.24                                 | 1.19                         | 2.34                                      | conserved hypothetical protein                                          |
| <i>CD630_12400 (vanZ)</i> | 28.43                                | 21.50                        | 0.74                                      | Teicoplanin resistance protein                                          |
| <i>CD630_16070</i>        | 30.25                                | 1.02                         | 0.16                                      | ABC-type transport system multidrug-family ATP-binding protein          |
| <i>CD630_16090</i>        | 30.62                                | 1.15                         | 0.15                                      | conserved hypothetical protein                                          |
| <i>CD630_16100</i>        | 64.45                                | 2.17                         | 0.13                                      | conserved hypothetical protein                                          |
| <i>CD630_16110</i>        | 34.77                                | 1.22                         | 0.14                                      | conserved hypothetical protein                                          |
| <i>CD630_16180 (clnA)</i> | 202.99                               | 57.26                        | 0.27                                      | ABC-type transport system multidrug-family ATP-binding protein          |
| <i>CD630_16190 (clnB)</i> | 192.16                               | 53.69                        | 0.27                                      | ABC-type transport system multidrug-family permease                     |
| <i>CD630_16310 (sodA)</i> | 2.59                                 | 2.70                         | 0.88                                      | spore coat protein-superoxide dismutase                                 |
| <i>CD630_16632</i>        | 0.32                                 | 0.22                         | 3.61                                      | conserved hypothetical protein                                          |
| <i>CD630_17000 (ribD)</i> | 3.65                                 | 1.11                         | 0.35                                      | Riboflavin biosynthesis protein                                         |
| <i>CD630_18870 (csfU)</i> | 5.34                                 | 1.24                         | 0.41                                      | Extracytoplasmic function (ECF) sigma factor                            |
| <i>CD630_18880 (rsiU)</i> | 3.69                                 | 0.95                         | 0.32                                      | Extracytoplasmic function (ECF) anti-sigma factor                       |
| <i>CD630_18890</i>        | 4.54                                 | 1.40                         | 0.47                                      | ABC-type transport system multidrug-family ATP-binding protein          |
| <i>CD630_18900</i>        | 3.60                                 | 1.17                         | 0.47                                      | ABC-type transport system multidrug-family permease                     |
| <i>CD630_20140 (ilvD)</i> | 2.90                                 | 1.02                         | 0.53                                      | Dihydroxy-acid dehydratase                                              |
| <i>CD630_20751</i>        | 2.21                                 | 0.51                         | 0.18                                      | conserved hypothetical protein                                          |
| <i>CD630_21510</i>        | 0.48                                 | 1.11                         | 2.34                                      | putative membrane protein DUF819 family                                 |
| <i>CD630_21710</i>        | 0.34                                 | 1.05                         | 2.18                                      | Fragment of putative sodium:dicarboxylate symporter                     |
| <i>CD630_22290</i>        | 0.51                                 | 1.02                         | 2.49                                      | putative membrane protein                                               |
| <i>CD630_23090</i>        | 2.29                                 | 1.03                         | 0.50                                      | conserved hypothetical protein                                          |
| <i>CD630_23790 (buk2)</i> | 3.13                                 | 0.81                         | 0.41                                      | Butyrate kinase                                                         |
| <i>CD630_23800 (iorB)</i> | 10.81                                | 0.64                         | 0.24                                      | Indole pyruvate ferredoxin/flavodoxin oxidoreductase                    |
| <i>CD630_23810 (iorA)</i> | 13.66                                | 0.62                         | 0.22                                      | Indole pyruvate ferredoxin/flavodoxin oxidoreductase                    |
| <i>CD630_25150</i>        | 0.38                                 | 1.02                         | 2.45                                      | putative L-aspartate-beta-decarboxylase                                 |

|                           |      |      |      |                                                                                         |
|---------------------------|------|------|------|-----------------------------------------------------------------------------------------|
| <i>CD630_26140</i>        | 0.12 | 1.18 | 7.62 | uncharacterised protein DegV family                                                     |
| <i>CD630_26640 (murE)</i> | 0.35 | 1.08 | 2.42 | UDP-N-acetylmuramyl-tripeptide synthetase                                               |
| <i>CD630_26700</i>        | 0.43 | 0.91 | 2.10 | ABC-type transport system ATP-binding protein<br>putative oligopeptide transport system |
| <i>CD630_26870</i>        | 0.46 | 0.43 | 0.79 | conserved hypothetical protein                                                          |
| <i>CD630_27491</i>        | 0.38 | 0.92 | 3.46 | Autoinducer prepeptide                                                                  |
| <i>CD630_27840 (cwp6)</i> | 2.30 | 0.97 | 0.49 | putative N-acetylmuramoyl-L-alanineamidase autolysin                                    |
| <i>CD630_29330</i>        | 0.50 | 0.32 | 1.45 | Hypothetical protein                                                                    |
| <i>CD630_29341</i>        | 0.29 | 0.23 | 1.34 | putative phage protein                                                                  |
| <i>CD630_29360</i>        | 0.44 | 0.45 | 0.57 | putative phage protein                                                                  |
| <i>CD630_29490</i>        | 0.46 | 0.44 | 0.48 | Transcriptional regulator Phage-type                                                    |
| <i>CD630_33730 (mgtA)</i> | 3.39 | 0.78 | 0.27 | Magnesium-transporting ATPase P-type Tn916-like<br>CTn7-Orf7                            |
| <i>CD630_33740</i>        | 3.92 | 0.76 | 0.21 | putative conjugative transposon protein Tn916-like<br>CTn7-Orf8                         |
| <i>CD630_33750 (mgtC)</i> | 2.96 | 0.57 | 0.27 | Magnesium-transporting ATPase protein Tn916-like<br>CTn7-Orf10                          |
| <i>CD630_35370 (phnH)</i> | 0.39 | 0.22 | 1.96 | putative phosphonate metabolism protein                                                 |

<sup>a</sup>Gene accession numbers are given for strain 630. Genes are included in this list if they had  $\geq 2$ -fold increase or decrease in expression and a  $p$  value  $\leq 0.05$  by Student's two-tailed  $t$ -test in both 630 $\Delta erm$  in LL-37 and the *clnR* mutant (either with or without LL-37).

<sup>b</sup>Ratio of no LL-37/with LL-37 as determined by RNA sequencing analysis of 630 $\Delta erm$  grown in BHIS alone or BHIS supplemented with 2  $\mu\text{g/ml}$  LL-37 as described in Methods.

<sup>c</sup>Ratio of expression in *clnR* mutant/expression in 630 $\Delta erm$  as determined by RNA sequencing analysis of strains grown in BHIS alone as described in Methods.

<sup>d</sup>Ratio of expression in *clnR* mutant/expression in 630 $\Delta erm$  as determined by RNA sequencing analysis of strains grown in BHIS supplemented with 2  $\mu\text{g/ml}$  LL-37 as described in Methods.

**Table S6. Relative expression of selected RNA-seq transcripts in *clnR* and *clnAB* mutants**

| Gene                                     | BHIS                   |                   |              |                                   |                                    | + LL-37 (2 µg/ml) |                      |                      |                                   |                                    |
|------------------------------------------|------------------------|-------------------|--------------|-----------------------------------|------------------------------------|-------------------|----------------------|----------------------|-----------------------------------|------------------------------------|
|                                          | 630Δ <i>erm</i>        | <i>clnR</i>       | <i>clnAB</i> | <i>clnR</i><br>Tn:: <i>clnRAB</i> | <i>clnAB</i><br>Tn:: <i>clnRAB</i> | 630Δ <i>erm</i>   | <i>clnR</i>          | <i>clnAB</i>         | <i>clnR</i><br>Tn:: <i>clnRAB</i> | <i>clnAB</i><br>Tn:: <i>clnRAB</i> |
| <i>cdd4</i> (CD630_06670)                | 1.0 ± 0.0 <sup>a</sup> | 0.9 ± 0.1         | 1.1 ± 0.2    | 0.9 ± 0.2                         | 1.0 ± 0.2                          | 7.1*± 2.4         | <b>915.0*</b> ± 30.5 | <b>1672.6*</b> ± 357 | 57.2*± 16.1                       | 314.8*± 98.0                       |
| <i>vanZ1</i> (CD630_12400)               | 1.0 ± 0.0              | <b>25.2</b> ± 5.5 | 0.8 ± 0.1    | 0.8 ± 0.1                         | 0.6 ± 0.0                          | 36.9*± 6.0        | <b>13.4</b> ± 5.8    | <b>0.9</b> ± 0.2     | <b>81.5*</b> ± 7.5                | <b>0.6</b> ± 0.1                   |
| <i>cstA</i> (CD630_26000)                | 1.0 ± 0.0              | 0.9 ± 0.2         | 1.2 ± 0.1    | 0.6 ± 0.1                         | 0.8 ± 0.2                          | 6.7*± 1.5         | 2.3 ± 0.5            | 2.9 ± 1.2            | 36.3 ± 21.3                       | 1.3 ± 0.2                          |
| <i>sigU</i> ( <i>csfU</i> ; CD630_18870) | 1.0 ± 0.0              | 0.5 ± 0.2         | 1.3 ± 0.3    | 0.6 ± 0.1                         | 0.7 ± 0.1                          | 10.5 ± 6.8        | 2.0 ± 0.6            | 3.1 ± 1.4            | <b>25.6*</b> ± 1.9                | 0.8 ± 0.1                          |
| <i>sigT</i> ( <i>csfT</i> ; CD630_06770) | 1.0 ± 0.0              | 0.9 ± 0.1         | 1.0 ± 0.2    | 1.1 ± 0.1                         | 1.1 ± 0.1                          | 3.6*± 0.1         | 2.3 ± 1.1            | 1.2 ± 0.1            | <b>25.3*</b> ± 1.7                | 1.2 ± 0.2                          |
| <i>grdA</i> (CD630_23520)                | 1.0 ± 0.0              | 0.9 ± 0.1         | 1.0 ± 0.0    | 0.9 ± 0.1                         | 1.3 ± 0.2                          | 16.5 ± 10.5       | 1.4 ± 0.1            | 1.9* ± 0.1           | <b>1649.2</b> ± 814.6             | 1.6 ± 0.2                          |
| <i>mtlA</i> (CD630_23340)                | 1.0 ± 0.0              | 0.9 ± 0.4         | 3.3 ± 2.1    | 0.6 ± 0.2                         | 0.5 ± 0.1                          | 1.0 ± 0.3         | 1.2 ± 0.7            | 5.5 ± 4.3            | 0.6 ± 0.2                         | 0.7 ± 0.4                          |
| <i>iorA</i> (CD630_23810)                | 1.0 ± 0.0              | <b>0.5</b> ± 0.1  | 0.7 ± 0.1    | 0.7 ± 0.0                         | 1.1 ± 0.2                          | 16.8 ± 8.4        | 2.1*± 0.4            | 20.5 ± 7.3           | <b>112.4*</b> ± 19.9              | 2.8*± 0.3                          |
| CD630_02840                              | 1.0 ± 0.0              | 1.2 ± 0.1         | 1.1 ± 0.1    | 1.1 ± 0.2                         | 1.3 ± 0.2                          | 29.3 ± 18.8       | 2.2 ± 0.5            | 2.1* ± 0.2           | 602.6 ± 455.6                     | 2.8*± 0.1                          |

<sup>a</sup>Relative expression levels were determined by qRT-PCR and are normalized to 630Δ*erm* in BHIS as described in methods. Values shown are the mean of at least 3 biological replicates ± standard error of the mean. Data were analyzed by one-way ANOVA and Dunnett's multiple comparisons test for comparisons to 630Δ*erm* in the same condition or by Student's *t* test with Holm-Sidak correction for comparisons of the same strain with/without LL-37. Bolded values indicate an adjusted *p* value < 0.05 comparing to 630Δ*erm* in the same condition; \* indicates an adjusted *p* value < 0.05 comparing the same strain with/without LL-37.

**Table S7. Maximum doubling times for 630 $\Delta$ erm, *clnR*, *clnAB*, *clnR* Tn::*clnRAB*, and *clnAB* Tn::*clnRAB* in minimal media supplemented with metabolites, with or without LL-37**

| MM <sup>a</sup> | strain                          | No LL-37                         | LL-37 <sup>c</sup>               |
|-----------------|---------------------------------|----------------------------------|----------------------------------|
|                 |                                 | Doubling time (min) <sup>b</sup> | Doubling time (min) <sup>b</sup> |
| --              | 630 $\Delta$ erm                | 73.2 ± 3.4                       | 82.2 ± 5.1                       |
|                 | <i>clnR</i>                     | 76.3 ± 2.6                       | 74.1 ± 4.8                       |
|                 | <i>clnAB</i>                    | 73.5 ± 2.3                       | 77.1 ± 5.3                       |
|                 | <i>clnR</i> Tn:: <i>clnRAB</i>  | 71.6 ± 2.5                       | <sup>§</sup> 84.8 ± 4.5          |
|                 | <i>clnAB</i> Tn:: <i>clnRAB</i> | 71.7 ± 2.0                       | 76.4 ± 2.6                       |
| Glucose         | 630 $\Delta$ erm                | 66.2 ± 3.7                       | 67.7 ± 4.9                       |
|                 | <i>clnR</i>                     | 68.4 ± 3.5                       | 74.0 ± 1.7                       |
|                 | <i>clnAB</i>                    | *61.4 ± 3.3                      | 62.1 ± 2.2                       |
|                 | <i>clnR</i> Tn:: <i>clnRAB</i>  | 64.6 ± 3.7                       | 76.4 ± 5.4                       |
|                 | <i>clnAB</i> Tn:: <i>clnRAB</i> | 63.6 ± 2.5                       | 70.8 ± 4.8                       |
| Fructose        | 630 $\Delta$ erm                | 64.8 ± 4.1                       | 70.2 ± 3.9                       |
|                 | <i>clnR</i>                     | 70.6 ± 1.7                       | 72.4 ± 0.9                       |
|                 | <i>clnAB</i>                    | 63.9 ± 3.5                       | 65.1 ± 2.0                       |
|                 | <i>clnR</i> Tn:: <i>clnRAB</i>  | 67.8 ± 2.5                       | 80.4 ± 7.4                       |
|                 | <i>clnAB</i> Tn:: <i>clnRAB</i> | 67.2 ± 2.6                       | 69.8 ± 2.5                       |
| Mannose         | 630 $\Delta$ erm                | 71.0 ± 5.2                       | 70.3 ± 5.5                       |
|                 | <i>clnR</i>                     | 70.5 ± 2.9                       | 78.4 ± 4.9                       |
|                 | <i>clnAB</i>                    | 65.6 ± 3.7                       | 66.8 ± 4.5                       |
|                 | <i>clnR</i> Tn:: <i>clnRAB</i>  | 72.4 ± 4.6                       | 80.4 ± 8.3                       |
|                 | <i>clnAB</i> Tn:: <i>clnRAB</i> | 68.9 ± 3.4                       | 72.6 ± 3.1                       |
| Mannitol        | 630 $\Delta$ erm                | 60.0 ± 2.1                       | 69.9 ± 3.4                       |
|                 | <i>clnR</i>                     | 63.7 ± 0.4                       | 67.3 ± 1.5                       |
|                 | <i>clnAB</i>                    | 60.1 ± 3.2                       | 58.3 ± 5.5                       |
|                 | <i>clnR</i> Tn:: <i>clnRAB</i>  | 64.5 ± 2.6                       | 75.6 ± 5.3                       |
|                 | <i>clnAB</i> Tn:: <i>clnRAB</i> | *62.4 ± 0.7                      | 66.4 ± 1.8                       |
| NAG             | 630 $\Delta$ erm                | 66.6 ± 2.7                       | <sup>§</sup> 91.5 ± 5.7          |
|                 | <i>clnR</i>                     | 81.8 ± 1.5                       | 86.6 ± 2.5                       |
|                 | <i>clnAB</i>                    | 70.9 ± 0.8                       | <sup>§</sup> 80.3 ± 1.0          |
|                 | <i>clnR</i> Tn:: <i>clnRAB</i>  | 73.6 ± 3.1                       | 111.1 ± 16.5                     |
|                 | <i>clnAB</i> Tn:: <i>clnRAB</i> | *72.4 ± 1.4                      | <sup>§</sup> 83.6 ± 1.7          |
| EA              | 630 $\Delta$ erm                | 78.4 ± 4.0                       | 90.7 ± 7.9                       |
|                 | <i>clnR</i>                     | *89.9 ± 3.2                      | 84.9 ± 4.6                       |
|                 | <i>clnAB</i>                    | 87.7 ± 7.0                       | 79.6 ± 9.0                       |
|                 | <i>clnR</i> Tn:: <i>clnRAB</i>  | 86.2 ± 4.7                       | 93.4 ± 12.2                      |
|                 | <i>clnAB</i> Tn:: <i>clnRAB</i> | 85.9 ± 7.2                       | 84.0 ± 6.7                       |

<sup>a</sup>Strains were grown in MM with additional nutrients as listed: 30mM glucose, 30 mM fructose, 30 mM mannose, 30 mM N-acetylglucosamine (NAG), 30 mM mannitol, 30 mM ethanolamine (EA)

<sup>b</sup>Doubling time was calculated during the 2 hour period of maximal growth after the conclusion of peptide-fueled growth, where  $t_d = \ln(2)/\mu$ , where  $\mu = (\ln(OD_{t_2}) - \ln(OD_{t_1})) / (t_2 - t_1)^{1,2}$ . Values shown are the average of at least three independent experiments ± standard deviation.

<sup>c</sup>LL-37, 0.5 µg/ml

<sup>§</sup>To compare +/- LL-37 for each strain/substrate (across rows), data were analyzed by Student's *t* test (<sup>§</sup>indicates  $p < 0.05$ ).

\*To compare the growth of strains in each condition (within boxes), data were analyzed by one-way ANOVA with Dunnett's test for multiple comparisons (\* indicates adjusted  $p < 0.05$ )

**Table S8. Expression of toxin regulation-associated genes**

| Gene                       | Fold-change in expression LL-37 <sup>a, b</sup> |
|----------------------------|-------------------------------------------------|
| <i>sigD</i>                | 0.95 ± 0.08                                     |
| <i>tcdR</i>                | 1.47 ± 0.44                                     |
| <i>ilvC</i> <sup>c</sup>   | <b>2.21 ± 0.20</b>                              |
| <i>CD0341</i> <sup>d</sup> | 2.54 ± 0.59                                     |

<sup>a</sup>Fold-change determined by qRT-PCR and normalized to 630 $\Delta$ *erm* grown in BHIS alone. Concentration of LL-37 = 2  $\mu$ g/ml. Values are the mean of three replicates  $\pm$  standard error of the mean.

<sup>b</sup>Bolded values indicate significant difference ( $p$  value < 0.05) from 630 $\Delta$ *erm* grown in BHIS without LL-37 and analyzed by Student's two-tailed  $t$ -test.

<sup>c</sup>*ilvC* indicates CodY activity.

<sup>d</sup>*CD0341* indicates CcpA activity.



**Table S9. Plasmids and Strains**

| Plasmid or Strain   | Relevant genotype or features                                                                                                                                    | Source, construction or reference |
|---------------------|------------------------------------------------------------------------------------------------------------------------------------------------------------------|-----------------------------------|
| <b>Strains</b>      |                                                                                                                                                                  |                                   |
| <i>E. coli</i>      |                                                                                                                                                                  |                                   |
| HB101               | F <sup>-</sup> <i>mcrB mrr hsdS20</i> (r <sub>B</sub> <sup>-</sup> m <sub>B</sub> <sup>-</sup> ) <i>recA13 leuB6 ara-14 proA2 lacY1 galK2 xyl-5 mtl-1 rpsL20</i> | B. Dupuy                          |
| MC101               | HB101 pRK24                                                                                                                                                      | B. Dupuy                          |
| MC135               | HB101 pRK24 pMC123                                                                                                                                               | (McBride and Sonenshein, 2011)    |
| MC881               | HB101 pRK24 pMC616                                                                                                                                               |                                   |
| MC932               | HB101 pRK24 pMC645                                                                                                                                               |                                   |
| MC1122              | HB101 pRK24 pMC723                                                                                                                                               |                                   |
| <i>B. subtilis</i>  |                                                                                                                                                                  |                                   |
| BS49                | <i>Tn916</i>                                                                                                                                                     |                                   |
| MC951               | BS49 <i>Tn916::CD1617-1619</i>                                                                                                                                   |                                   |
| <i>C. difficile</i> |                                                                                                                                                                  |                                   |
| 630                 | Clinical isolate                                                                                                                                                 | <sup>3</sup>                      |
| 630Δ <i>erm</i>     | Erm <sup>S</sup> derivative of strain 630                                                                                                                        | N. Minton <sup>4</sup>            |
| R20291              | Clinical isolate                                                                                                                                                 | <sup>5</sup>                      |
| MC324               | 630Δ <i>erm</i> pMC123                                                                                                                                           | (Edwards et al., 2014)            |
| MC885               | 630Δ <i>erm</i> <i>CD1617::ermB</i>                                                                                                                              |                                   |
| MC935               | 630Δ <i>erm</i> <i>CD1618::ermB</i>                                                                                                                              |                                   |
| MC950               | MC885 <i>Tn916::CD1617-1619</i>                                                                                                                                  |                                   |
| MC953               | MC935 <i>Tn916::CD1617-1619</i>                                                                                                                                  |                                   |
| MC1123              | MC885 pMC123                                                                                                                                                     |                                   |
| MC1131              | MC885 pMC723                                                                                                                                                     |                                   |
| <b>Plasmids</b>     |                                                                                                                                                                  |                                   |
| pRK24               | Tra <sup>+</sup> , Mob <sup>+</sup> ; <i>bla</i> , <i>tet</i>                                                                                                    | <sup>6</sup>                      |
| pCR2.1              | <i>bla</i> , <i>kan</i>                                                                                                                                          | Invitrogen                        |
| pUC19               | Cloning vector; <i>bla</i>                                                                                                                                       | <sup>7</sup>                      |
| pCE240              | <i>C. difficile</i> TargeTron→ construct based on pJIR750ai (group II intron, <i>ermB::RAM</i> , <i>ltrA</i> ); <i>catP</i>                                      | C. Ellermeier; <sup>8</sup>       |
| pSMB47              | <i>Tn916</i> integrational vector; CmR, ErmR                                                                                                                     | <sup>9</sup>                      |
| pMC123              | <i>E. coli-C. difficile</i> shuttle vector; <i>bla</i> , <i>catP</i>                                                                                             |                                   |
| pMC577              | pCR2.1 with <i>clnR</i> -targeted intron                                                                                                                         |                                   |
| pMC602              | pCE240 with <i>clnR</i> -targeted intron                                                                                                                         |                                   |
| pMC616              | pMC123 with <i>clnR</i> -targeted intron (~nt 127, <i>ermB::RAM ltrA catP</i> )                                                                                  |                                   |
| pMC643              | pCE240 with <i>clnA</i> -targeted intron                                                                                                                         |                                   |
| pMC645              | pMC123 with <i>clnA</i> -targeted intron (~nt 217, <i>ermB::RAM ltrA catP</i> )                                                                                  |                                   |
| pMC649              | pSMB47 <i>Tn916::CD1617-1619</i>                                                                                                                                 |                                   |
| pMC723              | pMC123 with P <sub><i>clnR</i></sub> ::His- <i>clnRAB</i>                                                                                                        |                                   |

**Table S10. Oligonucleotides**

| Primer  | Sequence <sup>a</sup>                                             | Purpose, source, or reference <sup>b</sup>                       |
|---------|-------------------------------------------------------------------|------------------------------------------------------------------|
| oMC44   | CTAGCTGCTCCTATGTCTCACATC                                          | <i>rpoC</i> (CD0067) qPCR <sup>10</sup>                          |
| oMC45   | CCAGTCTCTCCTGGATCAACTA                                            | <i>rpoC</i> (CD0067) qPCR <sup>10</sup>                          |
| oMC112  | GGCAAATGTAAGATTTTCGTACTIONA                                       | <i>tcdB</i> (CD0660) qPCR <sup>11</sup>                          |
| oMC113  | TCGACTACAGTATTCTCTGAC                                             | <i>tcdB</i> (CD0660) qPCR <sup>11</sup>                          |
| oMC152  | GTTATGGAAGTCAAGGACATGCAC                                          | <i>ilvC</i> (CD1565) qPCR <sup>12</sup>                          |
| oMC153  | GCTTCTGCTACACTCTTAACTTCA                                          | <i>ilvC</i> (CD1565) qPCR <sup>12</sup>                          |
| oMC178  | CTTGAGTTAAATCTTGTGCAGTCA                                          | <i>csfU</i> (CD1887) qPCR                                        |
| oMC179  | GGTGATAATAGTGAATGATGCTCGG                                         | <i>csfU</i> (CD1887) qPCR                                        |
| oMC189  | TGCCTCTTGTAAGAGTATAGCA                                            | <i>sigD</i> (CD0266) qPCR <sup>11</sup>                          |
| oMC190  | GCATCAATCAATCCAATGACTCCAC                                         | <i>sigD</i> (CD0266) qPCR <sup>11</sup>                          |
| oMC242  | TCCACAAGGAGCTGTATATGGT                                            | <i>cdd4</i> (CD0667) qPCR                                        |
| oMC243  | GTGGGTTTTAGCAAGTCCAAGAA                                           | <i>cdd4</i> (CD0667) qPCR                                        |
| oMC547  | TGGATAGGTGGAGAAGTCAGT                                             | <i>tcdA</i> (CD0663) qPCR <sup>11</sup>                          |
| oMC548  | GCTGTAATGCTTCAGTGGTAGA                                            | <i>tcdA</i> (CD0663) qPCR <sup>11</sup>                          |
| oMC683  | GTATCTGACAACATCAATTGCCTAAA                                        | CD0341 qPCR <sup>11</sup>                                        |
| oMC684  | TCAGCTTGAGATTCAATTTCTTCATT                                        | CD0341 qPCR <sup>11</sup>                                        |
| oMC815  | TGGATTCTCTTAAGGAAGAACAATACTTTA                                    | <i>sigT</i> (CD0677) qPCR <sup>13</sup>                          |
| oMC816  | CCTTAACTTCATCTACTGAATAACCTTCA                                     | <i>sigT</i> (CD0677) qPCR <sup>13</sup>                          |
| oMC1249 | GTCGAGGATCCGATGACAAGTTATTGGAATACACAG                              | <i>Pspo0A</i> amplification                                      |
| oMC1290 | GAATGGGAACCTTGATAATAACAAACC                                       | check CD1617-1618 co-transcription;<br><i>clnR</i> (CD1617) qPCR |
| oMC1291 | AAGTTCTGTTAGAGCCTTTTGC                                            | check CD1616-1617 co-transcription;<br><i>clnR</i> (CD1617) qPCR |
| oMC1292 | AGGTGTAACAAGAGTTATGGAAC                                           | check CD1618-1619 co-transcription;<br><i>clnA</i> (CD1618) qPCR |
| oMC1293 | TCTATGGATGGTTTCATTCCATTTATC                                       | check CD1617-1618 co-transcription;<br><i>clnA</i> (CD1618) qPCR |
| oMC1294 | AAGCAAGTGGAAGAATATTTATACCG                                        | <i>clnB</i> (CD1619) qPCR                                        |
| oMC1295 | ACATTAATAACCTTCATCCCCC                                            | <i>clnB</i> (CD1619) qPCR                                        |
| oMC1297 | CACTGCAGTTTTATCCATTTTATAATTC                                      | screening for Targetron insertion in <i>clnR</i>                 |
| oMC1310 | AAAAGCTTTTGAACCCACGTCGATCGTGAACCGCATCT<br>TCTGGTGCGCCAGATAGGGT    | <i>clnR</i> (CD1617) intron retargeting                          |
| oMC1311 | CAGATTGTACAAATGTGGTGATAACAGATAAGTCCTTCT<br>GCTTAACTTACCTTTCTTTGT  | <i>clnR</i> (CD1617) intron retargeting                          |
| oMC1312 | CGCAAGTTTCTAATTTTCGGTTTGCGGTCGATAGAGGAAA<br>GTGTCT                | <i>clnR</i> (CD1617) intron retargeting                          |
| oMC1319 | AAAAGCTTTTGAACCCACGTCGATCGTGAAAAAATAGT<br>TTCAGTGCGCCAGATAGGGT    | <i>clnA</i> (CD1618) intron retargeting                          |
| oMC1320 | CAGATTGTACAAATGTGGTGATAACAGATAAGTCGTTTC<br>ATATAACTTACCTTTCTTTGT  | <i>clnA</i> (CD1618) intron retargeting                          |
| oMC1321 | CGCAAGTTTCTAATTTTCGGTTATTTTTTCGATAGAGGAAAG<br>TGTCT               | <i>clnA</i> (CD1618) intron retargeting                          |
| oMC1383 | GTAGAAGGAGCAGAGGTTGTTT                                            | <i>grdA</i> (CD2352) qPCR                                        |
| oMC1384 | TCAGCAGCATCTTTAACTCTGT                                            | <i>grdA</i> (CD2352) qPCR                                        |
| oMC1393 | TGAAACCATGAATCTTAGAAGCATAAAC                                      | <i>vanZ</i> (CD1240) qPCR                                        |
| oMC1394 | CACATATATCCCAAATGGTACAAATATAGC                                    | <i>vanZ</i> (CD1240) qPCR                                        |
| oMC1410 | GTGGGATCCGCTAAAACCTTATTACAG                                       | <i>clnA</i> (CD1618) cloning                                     |
| oMC1416 | GTGGGATCCAGAAGAACAGTTTAA                                          | <i>PclnR</i> cloning                                             |
| oMC1427 | GTTTGGAAAGCCAATGCCAA                                              | check CD1616-1617 co-transcription                               |
| oMC1467 | TAGCAGAAGATGCGGAAGTTAAT                                           | <i>clnR</i> (CD1617) qPCR                                        |
| oMC1473 | GTTACAAATCTTCCTTTAGTTCTCTGAC                                      | <i>clnR</i> (CD1617) qPCR                                        |
| oMC1476 | GCGCATGCATTACTCAAAGATAGCT                                         | <i>clnRAB</i> cloning                                            |
| oMC1483 | CTGGGTCAACACCACCTATAG                                             | verify <i>clnA</i> (CD1618) disruption                           |
| oMC1493 | GTTAGAAGAGCAAATGAGATGATTAAGC                                      | <i>clnA</i> (CD1618) qPCR                                        |
| oMC1614 | GTGTACTCCACCAGCAAAGA                                              | <i>cstA</i> (CD2600) qPCR                                        |
| oMC1615 | GCAGGGTTAGGTCCGATATTT                                             | <i>cstA</i> (CD2600) qPCR                                        |
| oMC1684 | GCGGAATTCCTAAAAAGTAATTGACATATACTTTG                               | <i>PclnR</i> cloning                                             |
| oMC1689 | GTGGGATCCGGCGCCATGCATCACCATCACCATCACAT<br>GGAATGGGAACCTTGATAATAAC | <i>clnR</i> cloning with His-tag                                 |

|         |                                                                 |                                                    |
|---------|-----------------------------------------------------------------|----------------------------------------------------|
| oMC1690 | GTGGGCGCCGTTTCATGCCTCCTTATTA                                    | <i>PclnR</i> cloning                               |
| oMC1691 | FAM-CTAAAAAGTAATTGACATATACTTTG                                  | <i>PclnR</i> amplification with fluorescein        |
| oMC1692 | FAM-CATGCCTCCTTATTATATTATTG                                     | <i>PclnR</i> amplification with fluorescein        |
| oMC1700 | FAM-AGTTTGTGCAGTTTCTGAA                                         | <i>PiorA</i> amplification with fluorescein        |
| oMC1701 | FAM-ACTACAATTATTAATTCATAGATG                                    | <i>PiorA</i> amplification with fluorescein        |
| oMC1702 | FAM-CTCCAAAATACTACATAAAATAA                                     | <i>PmtIA</i> amplification with fluorescein        |
| oMC1703 | FAM-TATATCGATATGATCCCTTTTG                                      | <i>PmtIA</i> amplification with fluorescein        |
| oMC1704 | FAM-CAAATTAATAAAGCAATTTATA                                      | <i>PCD1606</i> amplification with fluorescein      |
| oMC1705 | FAM-CTAGTGTATTAATACGATAGTAC                                     | <i>PCD1606</i> amplification with fluorescein      |
| oMC1706 | FAM-TTGTTTAAGTATTAATTATGAGT                                     | <i>PcsfU</i> amplification with fluorescein        |
| oMC1707 | FAM-CGTCATTATATATAACGATTTATAC                                   | <i>PcsfU</i> amplification with fluorescein        |
| oMC1710 | FAM-ATGTTTCATCCCCTTTTTTAATC                                     | <i>Pcdd4/CD0668</i> amplification with fluorescein |
| oMC1711 | FAM-CACCCTCCTTTAGTATACC                                         | <i>Pcdd4/CD0668</i> amplification with fluorescein |
| oMC1712 | FAM-CAATATTAATTTATTTTTAAAAATAG                                  | <i>PtcdA</i> amplification with fluorescein        |
| oMC1713 | FAM-AGTATTATTTTTGATAATAAATC                                     | <i>PtcdA</i> amplification with fluorescein        |
| oMC1714 | FAM-CTTGTAATAAAAATAAGATTTAAGTG                                  | <i>PgrdE</i> amplification with fluorescein        |
| oMC1715 | FAM-CACCCTCCTGTTATTTAATTTG                                      | <i>PgrdE</i> amplification with fluorescein        |
| oMC1716 | CACCAATAATTTTATTATTTTGTATTATTG                                  | <i>Pspo0A</i> amplification                        |
| oMC1735 | AGAAAGATATGAAATACTACAATAGC                                      | <i>PvanZ</i> amplification with fluorescein        |
| oMC1736 | TAGATTTTCAATTTATTACCTCCTTAC                                     | <i>PvanZ</i> amplification with fluorescein        |
| oMC1737 | AGtGaattcgagctcggtaccgggggatccCAGAAGAACAGTTTAAAC<br>CTTTTAAAAG  | <i>PclnR</i> Gibson assembly                       |
| oMC1738 | CATTCATGTGATGGTGATGGTGATGCATggcgccTTCATG<br>CCTCCTTATTATATTAttg | <i>PclnR</i> Gibson assembly                       |
| oMC1739 | CTCCAAAATACTACATAAAATAA                                         | <i>PmtIA</i> amplification                         |
| oMC1740 | TATATCGATATGATCCCTTTTG                                          | <i>PmtIA</i> amplification                         |
| oMC1741 | CAAATTAATAAAGCAATTTATA                                          | <i>PCD1606</i> amplification                       |
| oMC1742 | CTAGTGTATTAATACGATAGTAC                                         | <i>PCD1606</i> amplification                       |
| oMC1743 | TTGTTTAAGTATTAATTATGAGT                                         | <i>PcsfU</i> amplification                         |
| oMC1744 | CGTCATTATATATAACGATTTATAC                                       | <i>PcsfU</i> amplification                         |
| oMC1745 | ATGTTTCATCCCCTTTTTTAATC                                         | <i>Pcdd4/CD0668</i> amplification                  |
| oMC1746 | CACCCTCCTTTAGTATACC                                             | <i>Pcdd4/CD0668</i> amplification                  |
| oMC1717 | TTGAGTACTATAGGTGACCCAATGA                                       | <i>mtIA (CD2334)</i> qPCR                          |
| oMC1718 | CCTCTTTGTCCTGCTATTGCTTTA                                        | <i>mtIA (CD2334)</i> qPCR                          |
| oMC1719 | GGTAAATGGTGGTATGGTACTTATT                                       | <i>iorA (CD2381)</i> qPCR                          |
| oMC1720 | AGCTTCTTGACTAGTTGATGGTTC                                        | <i>iorA (CD2381)</i> qPCR                          |
| oMC1754 | GGAATAATAGTTATGACTCATGGGAGTT                                    | <i>CD0284</i> qPCR                                 |
| oMC1755 | AGTTTAATTGCTGCTGTTCTTTCTG                                       | <i>CD0284</i> qPCR                                 |
| tcdRqF  | AGCAAGAAATAACTCAGTAGATGATT                                      | <i>tcdR (CD0659)</i> qPCR <sup>14</sup>            |
| tcdRqR  | TTATTAAATCTGTTTCTCCCTCTTCA                                      | <i>tcdR (CD0659)</i> qPCR <sup>14</sup>            |

<sup>a</sup> All sequences are listed 5' to 3'. Underlined sequences denote restriction sites or intron retarget sites.

<sup>b</sup> Abbreviations: qPCR, quantitative PCR

## Table S11. Plasmid construct details.

**pMC602:** The group II intron of pCE240 was targeted to *CD1617* at nucleotide 127 by splicing PCR using primers oMC1310, oMC1311, oMC1312, and EBSu as outlined in the TargeTron users manual (Sigma-Aldrich). The primers for intron retargeting were obtained by using the jpintronator algorithm. The group II *CD1617*-targeted intron was subcloned using the *BsrGI* and *HindIII* sites into pCE240.

**pMC616:** The 5.45 kb *SphI/SfoI* fragment from pMC602 was cloned as *SphI/SnaBI* into pMC123.

**pMC643:** The group II intron of pCE240 was targeted to *CD1618* at nucleotide 217 by splicing PCR using primers oMC1319, oMC1320, oMC1321, and EBSu as outlined in the TargeTron users manual (Sigma-Aldrich). The primers for intron retargeting were obtained by using the jpintronator algorithm. The group II *CD1618*-targeted intron was subcloned using the *BsrGI* and *HindIII* sites into pCE240.

**pMC645:** The 5.45 kb *SphI/SfoI* fragment from pMC645 was cloned as *SphI/SnaBI* into pMC123.

**pMC649:** The coding sequence of *CD1617-1619* and 300 bp upstream of *CD1617* was amplified using oMC1416 and oMC1476 and cloned into pSMB47 as *BamHI/SphI*.

**pMC687:** The coding sequence of *CD1234* was amplified with primers oMC1609 and oMC1610 and cloned into pMC211 as *BamHI/PstI*.

**pMC723:** The *clnRAB* operon was amplified with an N-terminal 6x His tag using primers oMC1689 and oMC1476 and cloned as *BamHI/SphI* into pMC123. Subsequently, *PclnR* (amplified using primers oMC1737 and oMC1738) was cloned by Gibson assembly as *BamHI/SfoI*.

**Table S12. Expression of ClnR-dependent genes in the *clnR* mutant complemented with HIS-ClnR.**

| Gene                       | BHIS                      |                       |                                                        | + LL-37 (0.5 µg/ml)       |                       |                                                   |
|----------------------------|---------------------------|-----------------------|--------------------------------------------------------|---------------------------|-----------------------|---------------------------------------------------|
|                            | 630Δ <i>erm</i><br>pMC123 | <i>clnR</i><br>pMC123 | <i>clnR</i><br>pMC123<br><i>PclnR::HIS-<br/>clnRAB</i> | 630Δ <i>erm</i><br>pMC123 | <i>clnR</i><br>pMC123 | <i>clnR</i><br>pMC123<br><i>PclnR::HIS-clnRAB</i> |
| <i>clnA</i> (CD630_16180)  | 1.0 ± 0.0 <sup>a</sup>    | 37.4 ± 6.6            | 69.4 ± 20.3                                            | 81.6 ± 20.5               | 44.9 ± 8.0            | 236.5 ± 22.7                                      |
| <i>vanZ1</i> (CD630_12400) | 1.0 ± 0.0                 | 17.5 ± 2.4            | 4.1 ± 1.3                                              | 15.4 ± 2.8                | 21.8 ± 1.8            | 18.6 ± 2.3                                        |

<sup>a</sup>Relative expression levels were determined by qRT-PCR and are normalized to 630Δ*erm* + pMC123 in BHIS as described in methods. Values shown are the mean of 3 biological replicates ± standard error of the mean.

## Additional References

1. Dalgaard P, Koutsoumanis K. Comparison of maximum specific growth rates and lag times estimated from absorbance and viable count data by different mathematical models. *J Microbiol Methods* 2001;43:183-96, NIHMS
2. Pope CF, McHugh TD, Gillespie SH. Methods to determine fitness in bacteria. *Methods Mol Biol* 2010;642:113-21, NIHMS
3. Wust J, Hardegger U. Transferable resistance to clindamycin, erythromycin, and tetracycline in *Clostridium difficile*. *Antimicrob Agents Chemother* 1983;23:784-6.PMCID: PMC184818
4. Hussain HA, Roberts AP, Mullany P. Generation of an erythromycin-sensitive derivative of *Clostridium difficile* strain 630 (630Deltaerm) and demonstration that the conjugative transposon Tn916DeltaE enters the genome of this strain at multiple sites. *J Med Microbiol* 2005;54:137-41, NIHMS
5. Stabler RA, He M, Dawson L, Martin M, Valiente E, Corton C, Lawley TD, Sebahia M, Quail MA, Rose G, Gerding DN, Gibert M, Popoff MR, Parkhill J, Dougan G, Wren BW. Comparative genome and phenotypic analysis of *Clostridium difficile* 027 strains provides insight into the evolution of a hypervirulent bacterium. *Genome Biology* 2009;10:R102.PMCID: 2768977
6. Thomas CM, Smith CA. Incompatibility group P plasmids: genetics, evolution, and use in genetic manipulation. *Annu Rev Microbiol* 1987;41:77-101, NIHMS
7. Yanisch-Perron C, Vieira J, Messing J. Improved M13 phage cloning vectors and host strains: nucleotide sequences of the M13mp18 and pUC19 vectors. *Gene* 1985;33:103-19, NIHMS
8. Ho TD, Ellermeier CD. PrsW is required for colonization, resistance to antimicrobial peptides, and expression of extracytoplasmic function sigma factors in *Clostridium difficile*. *Infect Immun* 2011;79:3229-38.PMCID: 3147581
9. Manganelli R, Provvedi R, Berneri C, Oggioni MR, Pozzi G. Insertion vectors for construction of recombinant conjugative transposons in *Bacillus subtilis* and *Enterococcus faecalis*. *FEMS Microbiol Lett* 1998;168:259-68, NIHMS
10. McBride SM, Sonenshein AL. Identification of a genetic locus responsible for antimicrobial peptide resistance in *Clostridium difficile*. *Infection and Immunity* 2011;79:167-76.PMCID: 3019887
11. Edwards AN, Nawrocki KL, McBride SM. Conserved oligopeptide permeases modulate sporulation initiation in *Clostridium difficile*. *Infect Immun* 2014;82:4276-91.PMCID: 4187847
12. Dineen SS, McBride SM, Sonenshein AL. Integration of metabolism and virulence by *Clostridium difficile* CodY. *J Bacteriol* 2010;192:5350-62.PMCID: 2950512
13. Woods EC, Nawrocki KL, Suárez JM, McBride SM. The *Clostridium difficile* Dlt pathway is controlled by the ECF sigma factor,  $\sigma_V$ , in response to lysozyme. *Infection and Immunity* 2016;10.1128/iai.00207-16:IAI.00207-16, NIHMS
14. McKee RW, Mangalea MR, Purcell EB, Borchardt EK, Tamayo R. The second messenger cyclic Di-GMP regulates *Clostridium difficile* toxin production by controlling expression of *sigD*. *J Bacteriol* 2013;195:5174-85.PMCID: 3811590
