# Supplementary material for: The C. difficile clnRAB operon initiates adaptations to the host environment in response to LL-37
Source: PubMed Central journal article supplement (PMC6117091; doi:10.1371/journal.ppat.1007153), 2018-08-20
Supplement: ppat.1007153.s017.pdf [file ppat.1007153.s017.pdf]

**Table S6. Relative expression of selected RNA-seq transcripts in *clnR* and *clnAB* mutants**

| Gene                                     | BHIS                   |                   |              |                                   |                                    | + LL-37 (2 µg/ml) |                      |                      |                                   |                                    |
|------------------------------------------|------------------------|-------------------|--------------|-----------------------------------|------------------------------------|-------------------|----------------------|----------------------|-----------------------------------|------------------------------------|
|                                          | 630Δ <i>erm</i>        | <i>clnR</i>       | <i>clnAB</i> | <i>clnR</i><br>Tn:: <i>clnRAB</i> | <i>clnAB</i><br>Tn:: <i>clnRAB</i> | 630Δ <i>erm</i>   | <i>clnR</i>          | <i>clnAB</i>         | <i>clnR</i><br>Tn:: <i>clnRAB</i> | <i>clnAB</i><br>Tn:: <i>clnRAB</i> |
| <i>cdd4</i> (CD630_06670)                | 1.0 ± 0.0 <sup>a</sup> | 0.9 ± 0.1         | 1.1 ± 0.2    | 0.9 ± 0.2                         | 1.0 ± 0.2                          | 7.1*± 2.4         | <b>915.0*</b> ± 30.5 | <b>1672.6*</b> ± 357 | 57.2*± 16.1                       | 314.8*± 98.0                       |
| <i>vanZ1</i> (CD630_12400)               | 1.0 ± 0.0              | <b>25.2</b> ± 5.5 | 0.8 ± 0.1    | 0.8 ± 0.1                         | 0.6 ± 0.0                          | 36.9*± 6.0        | <b>13.4</b> ± 5.8    | <b>0.9</b> ± 0.2     | <b>81.5*</b> ± 7.5                | <b>0.6</b> ± 0.1                   |
| <i>cstA</i> (CD630_26000)                | 1.0 ± 0.0              | 0.9 ± 0.2         | 1.2 ± 0.1    | 0.6 ± 0.1                         | 0.8 ± 0.2                          | 6.7*± 1.5         | 2.3 ± 0.5            | 2.9 ± 1.2            | 36.3 ± 21.3                       | 1.3 ± 0.2                          |
| <i>sigU</i> ( <i>csfU</i> ; CD630_18870) | 1.0 ± 0.0              | 0.5 ± 0.2         | 1.3 ± 0.3    | 0.6 ± 0.1                         | 0.7 ± 0.1                          | 10.5 ± 6.8        | 2.0 ± 0.6            | 3.1 ± 1.4            | <b>25.6*</b> ± 1.9                | 0.8 ± 0.1                          |
| <i>sigT</i> ( <i>csfT</i> ; CD630_06770) | 1.0 ± 0.0              | 0.9 ± 0.1         | 1.0 ± 0.2    | 1.1 ± 0.1                         | 1.1 ± 0.1                          | 3.6*± 0.1         | 2.3 ± 1.1            | 1.2 ± 0.1            | <b>25.3*</b> ± 1.7                | 1.2 ± 0.2                          |
| <i>grdA</i> (CD630_23520)                | 1.0 ± 0.0              | 0.9 ± 0.1         | 1.0 ± 0.0    | 0.9 ± 0.1                         | 1.3 ± 0.2                          | 16.5 ± 10.5       | 1.4 ± 0.1            | 1.9* ± 0.1           | <b>1649.2</b> ± 814.6             | 1.6 ± 0.2                          |
| <i>mtlA</i> (CD630_23340)                | 1.0 ± 0.0              | 0.9 ± 0.4         | 3.3 ± 2.1    | 0.6 ± 0.2                         | 0.5 ± 0.1                          | 1.0 ± 0.3         | 1.2 ± 0.7            | 5.5 ± 4.3            | 0.6 ± 0.2                         | 0.7 ± 0.4                          |
| <i>iorA</i> (CD630_23810)                | 1.0 ± 0.0              | <b>0.5</b> ± 0.1  | 0.7 ± 0.1    | 0.7 ± 0.0                         | 1.1 ± 0.2                          | 16.8 ± 8.4        | 2.1*± 0.4            | 20.5 ± 7.3           | <b>112.4*</b> ± 19.9              | 2.8*± 0.3                          |
| CD630_02840                              | 1.0 ± 0.0              | 1.2 ± 0.1         | 1.1 ± 0.1    | 1.1 ± 0.2                         | 1.3 ± 0.2                          | 29.3 ± 18.8       | 2.2 ± 0.5            | 2.1* ± 0.2           | 602.6 ± 455.6                     | 2.8*± 0.1                          |

<sup>a</sup>Relative expression levels were determined by qRT-PCR and are normalized to 630Δ*erm* in BHIS as described in methods. Values shown are the mean of at least 3 biological replicates ± standard error of the mean. Data were analyzed by one-way ANOVA and Dunnett's multiple comparisons test for comparisons to 630Δ*erm* in the same condition or by Student's *t* test with Holm-Sidak correction for comparisons of the same strain with/without LL-37. Bolded values indicate an adjusted *p* value < 0.05 comparing to 630Δ*erm* in the same condition; \* indicates an adjusted *p* value < 0.05 comparing the same strain with/without LL-37.
