# Supplementary material for: The C. difficile clnRAB operon initiates adaptations to the host environment in response to LL-37
Source: PubMed Central journal article supplement (PMC6117091; doi:10.1371/journal.ppat.1007153), 2018-08-20
Supplement: ppat.1007153.s018.pdf [file ppat.1007153.s018.pdf]

**Table S7. Maximum doubling times for 630 $\Delta$ erm, *clnR*, *clnAB*, *clnR* Tn::*clnRAB*, and *clnAB* Tn::*clnRAB* in minimal media supplemented with metabolites, with or without LL-37**

| MM <sup>a</sup> | strain                          | No LL-37                         | LL-37 <sup>c</sup>               |
|-----------------|---------------------------------|----------------------------------|----------------------------------|
|                 |                                 | Doubling time (min) <sup>b</sup> | Doubling time (min) <sup>b</sup> |
| --              | 630 $\Delta$ erm                | 73.2 ± 3.4                       | 82.2 ± 5.1                       |
|                 | <i>clnR</i>                     | 76.3 ± 2.6                       | 74.1 ± 4.8                       |
|                 | <i>clnAB</i>                    | 73.5 ± 2.3                       | 77.1 ± 5.3                       |
|                 | <i>clnR</i> Tn:: <i>clnRAB</i>  | 71.6 ± 2.5                       | <sup>§</sup> 84.8 ± 4.5          |
|                 | <i>clnAB</i> Tn:: <i>clnRAB</i> | 71.7 ± 2.0                       | 76.4 ± 2.6                       |
| Glucose         | 630 $\Delta$ erm                | 66.2 ± 3.7                       | 67.7 ± 4.9                       |
|                 | <i>clnR</i>                     | 68.4 ± 3.5                       | 74.0 ± 1.7                       |
|                 | <i>clnAB</i>                    | *61.4 ± 3.3                      | 62.1 ± 2.2                       |
|                 | <i>clnR</i> Tn:: <i>clnRAB</i>  | 64.6 ± 3.7                       | 76.4 ± 5.4                       |
|                 | <i>clnAB</i> Tn:: <i>clnRAB</i> | 63.6 ± 2.5                       | 70.8 ± 4.8                       |
| Fructose        | 630 $\Delta$ erm                | 64.8 ± 4.1                       | 70.2 ± 3.9                       |
|                 | <i>clnR</i>                     | 70.6 ± 1.7                       | 72.4 ± 0.9                       |
|                 | <i>clnAB</i>                    | 63.9 ± 3.5                       | 65.1 ± 2.0                       |
|                 | <i>clnR</i> Tn:: <i>clnRAB</i>  | 67.8 ± 2.5                       | 80.4 ± 7.4                       |
|                 | <i>clnAB</i> Tn:: <i>clnRAB</i> | 67.2 ± 2.6                       | 69.8 ± 2.5                       |
| Mannose         | 630 $\Delta$ erm                | 71.0 ± 5.2                       | 70.3 ± 5.5                       |
|                 | <i>clnR</i>                     | 70.5 ± 2.9                       | 78.4 ± 4.9                       |
|                 | <i>clnAB</i>                    | 65.6 ± 3.7                       | 66.8 ± 4.5                       |
|                 | <i>clnR</i> Tn:: <i>clnRAB</i>  | 72.4 ± 4.6                       | 80.4 ± 8.3                       |
|                 | <i>clnAB</i> Tn:: <i>clnRAB</i> | 68.9 ± 3.4                       | 72.6 ± 3.1                       |
| Mannitol        | 630 $\Delta$ erm                | 60.0 ± 2.1                       | 69.9 ± 3.4                       |
|                 | <i>clnR</i>                     | 63.7 ± 0.4                       | 67.3 ± 1.5                       |
|                 | <i>clnAB</i>                    | 60.1 ± 3.2                       | 58.3 ± 5.5                       |
|                 | <i>clnR</i> Tn:: <i>clnRAB</i>  | 64.5 ± 2.6                       | 75.6 ± 5.3                       |
|                 | <i>clnAB</i> Tn:: <i>clnRAB</i> | *62.4 ± 0.7                      | 66.4 ± 1.8                       |
| NAG             | 630 $\Delta$ erm                | 66.6 ± 2.7                       | <sup>§</sup> 91.5 ± 5.7          |
|                 | <i>clnR</i>                     | 81.8 ± 1.5                       | 86.6 ± 2.5                       |
|                 | <i>clnAB</i>                    | 70.9 ± 0.8                       | <sup>§</sup> 80.3 ± 1.0          |
|                 | <i>clnR</i> Tn:: <i>clnRAB</i>  | 73.6 ± 3.1                       | 111.1 ± 16.5                     |
|                 | <i>clnAB</i> Tn:: <i>clnRAB</i> | *72.4 ± 1.4                      | <sup>§</sup> 83.6 ± 1.7          |
| EA              | 630 $\Delta$ erm                | 78.4 ± 4.0                       | 90.7 ± 7.9                       |
|                 | <i>clnR</i>                     | *89.9 ± 3.2                      | 84.9 ± 4.6                       |
|                 | <i>clnAB</i>                    | 87.7 ± 7.0                       | 79.6 ± 9.0                       |
|                 | <i>clnR</i> Tn:: <i>clnRAB</i>  | 86.2 ± 4.7                       | 93.4 ± 12.2                      |
|                 | <i>clnAB</i> Tn:: <i>clnRAB</i> | 85.9 ± 7.2                       | 84.0 ± 6.7                       |

<sup>a</sup>Strains were grown in MM with additional nutrients as listed: 30mM glucose, 30 mM fructose, 30 mM mannose, 30 mM N-acetylglucosamine (NAG), 30 mM mannitol, 30 mM ethanolamine (EA)

<sup>b</sup>Doubling time was calculated during the 2 hour period of maximal growth after the conclusion of peptide-fueled growth, where  $t_d = \ln(2)/\mu$ , where  $\mu = (\ln(OD_{t_2}) - \ln(OD_{t_1})) / (t_2 - t_1)^{1,2}$ . Values shown are the average of at least three independent experiments ± standard deviation.

<sup>c</sup>LL-37, 0.5 µg/ml

<sup>§</sup>To compare +/- LL-37 for each strain/substrate (across rows), data were analyzed by Student's *t* test (<sup>§</sup>indicates  $p < 0.05$ ).

\*To compare the growth of strains in each condition (within boxes), data were analyzed by one-way ANOVA with Dunnett's test for multiple comparisons (\* indicates adjusted  $p < 0.05$ )
