# Supplementary material for: The C. difficile clnRAB operon initiates adaptations to the host environment in response to LL-37
Source: PubMed Central journal article supplement (PMC6117091; doi:10.1371/journal.ppat.1007153), 2018-08-20
Supplement: ppat.1007153.s019.pdf [file ppat.1007153.s019.pdf]

**Table S8. Expression of toxin regulation-associated genes**

| Gene                       | Fold-change in expression LL-37 <sup>a, b</sup> |
|----------------------------|-------------------------------------------------|
| <i>sigD</i>                | 0.95 ± 0.08                                     |
| <i>tcdR</i>                | 1.47 ± 0.44                                     |
| <i>ilvC</i> <sup>c</sup>   | <b>2.21 ± 0.20</b>                              |
| <i>CD0341</i> <sup>d</sup> | 2.54 ± 0.59                                     |

<sup>a</sup>Fold-change determined by qRT-PCR and normalized to 630 $\Delta$ *erm* grown in BHIS alone. Concentration of LL-37 = 2  $\mu$ g/ml. Values are the mean of three replicates  $\pm$  standard error of the mean.

<sup>b</sup>Bolded values indicate significant difference (P value < 0.05) from 630 $\Delta$ *erm* grown in BHIS without LL-37 and analyzed by Student's two-tailed *t*-test.

<sup>c</sup>*ilvC* indicates CodY activity.

<sup>d</sup>*CD0341* indicates CcpA activity.
