# Supplementary material for: The C. difficile clnRAB operon initiates adaptations to the host environment in response to LL-37
Source: PubMed Central journal article supplement (PMC6117091; doi:10.1371/journal.ppat.1007153), 2018-08-20
Supplement: ppat.1007153.s020.pdf [file ppat.1007153.s020.pdf]

**Table S9. Plasmids and Strains**

| Plasmid or Strain   | Relevant genotype or features                                                                                                                                    | Source, construction or reference |
|---------------------|------------------------------------------------------------------------------------------------------------------------------------------------------------------|-----------------------------------|
| <b>Strains</b>      |                                                                                                                                                                  |                                   |
| <i>E. coli</i>      |                                                                                                                                                                  |                                   |
| HB101               | F <sup>-</sup> <i>mcrB mrr hsdS20</i> (r <sub>B</sub> <sup>-</sup> m <sub>B</sub> <sup>-</sup> ) <i>recA13 leuB6 ara-14 proA2 lacY1 galK2 xyl-5 mtl-1 rpsL20</i> | B. Dupuy                          |
| MC101               | HB101 pRK24                                                                                                                                                      | B. Dupuy                          |
| MC135               | HB101 pRK24 pMC123                                                                                                                                               | (McBride and Sonenshein, 2011)    |
| MC881               | HB101 pRK24 pMC616                                                                                                                                               |                                   |
| MC932               | HB101 pRK24 pMC645                                                                                                                                               |                                   |
| MC1122              | HB101 pRK24 pMC723                                                                                                                                               |                                   |
| <i>B. subtilis</i>  |                                                                                                                                                                  |                                   |
| BS49                | <i>Tn916</i>                                                                                                                                                     |                                   |
| MC951               | BS49 <i>Tn916::CD1617-1619</i>                                                                                                                                   |                                   |
| <i>C. difficile</i> |                                                                                                                                                                  |                                   |
| 630                 | Clinical isolate                                                                                                                                                 | <sup>3</sup>                      |
| 630Δ <i>erm</i>     | Erm <sup>S</sup> derivative of strain 630                                                                                                                        | N. Minton <sup>4</sup>            |
| R20291              | Clinical isolate                                                                                                                                                 | <sup>5</sup>                      |
| MC324               | 630Δ <i>erm</i> pMC123                                                                                                                                           | (Edwards et al., 2014)            |
| MC885               | 630Δ <i>erm</i> <i>CD1617::ermB</i>                                                                                                                              |                                   |
| MC935               | 630Δ <i>erm</i> <i>CD1618::ermB</i>                                                                                                                              |                                   |
| MC950               | MC885 <i>Tn916::CD1617-1619</i>                                                                                                                                  |                                   |
| MC953               | MC935 <i>Tn916::CD1617-1619</i>                                                                                                                                  |                                   |
| MC1123              | MC885 pMC123                                                                                                                                                     |                                   |
| MC1131              | MC885 pMC723                                                                                                                                                     |                                   |
| <b>Plasmids</b>     |                                                                                                                                                                  |                                   |
| pRK24               | Tra <sup>+</sup> , Mob <sup>+</sup> ; <i>bla</i> , <i>tet</i>                                                                                                    | <sup>6</sup>                      |
| pCR2.1              | <i>bla</i> , <i>kan</i>                                                                                                                                          | Invitrogen                        |
| pUC19               | Cloning vector; <i>bla</i>                                                                                                                                       | <sup>7</sup>                      |
| pCE240              | <i>C. difficile</i> TargeTron→ construct based on pJIR750ai (group II intron, <i>ermB::RAM</i> , <i>ltrA</i> ); <i>catP</i>                                      | C. Ellermeier; <sup>8</sup>       |
| pSMB47              | <i>Tn916</i> integrational vector; CmR, ErmR                                                                                                                     | <sup>9</sup>                      |
| pMC123              | <i>E. coli-C. difficile</i> shuttle vector; <i>bla</i> , <i>catP</i>                                                                                             |                                   |
| pMC577              | pCR2.1 with <i>clnR</i> -targeted intron                                                                                                                         |                                   |
| pMC602              | pCE240 with <i>clnR</i> -targeted intron                                                                                                                         |                                   |
| pMC616              | pMC123 with <i>clnR</i> -targeted intron (~nt 127, <i>ermB::RAM ltrA catP</i> )                                                                                  |                                   |
| pMC643              | pCE240 with <i>clnA</i> -targeted intron                                                                                                                         |                                   |
| pMC645              | pMC123 with <i>clnA</i> -targeted intron (~nt 217, <i>ermB::RAM ltrA catP</i> )                                                                                  |                                   |
| pMC649              | pSMB47 <i>Tn916::CD1617-1619</i>                                                                                                                                 |                                   |
| pMC723              | pMC123 with P <sub><i>clnR</i></sub> ::His- <i>clnRAB</i>                                                                                                        |                                   |
