# Supplementary material for: The C. difficile clnRAB operon initiates adaptations to the host environment in response to LL-37
Source: PubMed Central journal article supplement (PMC6117091; doi:10.1371/journal.ppat.1007153), 2018-08-20
Supplement: ppat.1007153.s021.pdf [file ppat.1007153.s021.pdf]

**Table S10. Oligonucleotides**

| Primer  | Sequence <sup>a</sup>                                             | Purpose, source, or reference <sup>b</sup>                        |
|---------|-------------------------------------------------------------------|-------------------------------------------------------------------|
| oMC44   | CTAGCTGCTCCTATGTCTCACATC                                          | <i>rpoC</i> (CD0067) qPCR <sup>10</sup>                           |
| oMC45   | CCAGTCTCTCCTGGATCAACTA                                            | <i>rpoC</i> (CD0067) qPCR <sup>10</sup>                           |
| oMC112  | GGCAAATGTAAGATTTTCGTACTIONA                                       | <i>tcdB</i> (CD0660) qPCR <sup>11</sup>                           |
| oMC113  | TCGACTACAGTATTCTCTGAC                                             | <i>tcdB</i> (CD0660) qPCR <sup>11</sup>                           |
| oMC152  | GTTATGGAAGTCAAGGACATGCAC                                          | <i>ilvC</i> (CD1565) qPCR <sup>12</sup>                           |
| oMC153  | GCTTCTGCTACACTCTTAACTTCA                                          | <i>ilvC</i> (CD1565) qPCR <sup>12</sup>                           |
| oMC178  | CTTGAGTTAAATCTTGTGCAGTCA                                          | <i>csfU</i> (CD1887) qPCR                                         |
| oMC179  | GGTGATAATAGTGAATGATGCTCGG                                         | <i>csfU</i> (CD1887) qPCR                                         |
| oMC189  | TGCCTCTTGTAAGAGTATAGCA                                            | <i>sigD</i> (CD0266) qPCR <sup>11</sup>                           |
| oMC190  | GCATCAATCAATCCAATGACTCCAC                                         | <i>sigD</i> (CD0266) qPCR <sup>11</sup>                           |
| oMC242  | TCCACAAGGAGCTGTATATGGT                                            | <i>cdd4</i> (CD0667) qPCR                                         |
| oMC243  | GTGGGTTTTAGCAAGTCCAAGAA                                           | <i>cdd4</i> (CD0667) qPCR                                         |
| oMC547  | TGGATAGGTGGAGAAGTCAGT                                             | <i>tcdA</i> (CD0663) qPCR <sup>11</sup>                           |
| oMC548  | GCTGTAATGCTTCAGTGGTAGA                                            | <i>tcdA</i> (CD0663) qPCR <sup>11</sup>                           |
| oMC683  | GTATCTGACAACATCAATTGCCTAAA                                        | CD0341 qPCR <sup>11</sup>                                         |
| oMC684  | TCAGCTTGAGATTCAATTTCTTCATT                                        | CD0341 qPCR <sup>11</sup>                                         |
| oMC815  | TGGATTCTCTTAAGGAAGAACAATACTTTA                                    | <i>sigT</i> (CD0677) qPCR <sup>13</sup>                           |
| oMC816  | CCTTAACTTCATCTACTGAATAACCTTCA                                     | <i>sigT</i> (CD0677) qPCR <sup>13</sup>                           |
| oMC1249 | GTCGAGGATCCGATGACAAGTTATTGGAATACACAG                              | <i>Pspo0A</i> amplification                                       |
| oMC1290 | GAATGGGAACCTTGATAATAACAAACC                                       | check CD1617-1618 co-transcription ;<br><i>clnR</i> (CD1617) qPCR |
| oMC1291 | AAGTTCTGTTAGAGCCTTTTGC                                            | check CD1616-1617 co-transcription;<br><i>clnR</i> (CD1617) qPCR  |
| oMC1292 | AGGTGTAAACAAGAGTTATGGAAC                                          | check CD1618-1619 co-transcription ;<br><i>clnA</i> (CD1618) qPCR |
| oMC1293 | TCTATGGATGGTTTCATTCCATTTATC                                       | check CD1617-1618 co-transcription ;<br><i>clnA</i> (CD1618) qPCR |
| oMC1294 | AAGCAAGTGGGAAGAATATTTATACCG                                       | <i>clnB</i> (CD1619) qPCR                                         |
| oMC1295 | ACATTAATAACCTTCATCCCCC                                            | <i>clnB</i> (CD1619) qPCR                                         |
| oMC1297 | CACTGCAGTTTTATCCATTTTATAATTC                                      | screening for Targetron insertion in <i>clnR</i>                  |
| oMC1310 | AAAAGCTTTTGCACCCACGTCGATCGTGAACCGCATCT<br>TCTGGTGCGCCCAGATAGGGT   | <i>clnR</i> (CD1617) intron retargeting                           |
| oMC1311 | CAGATTGTACAAATGTGGTGATAACAGATAAGTCCTTCT<br>GCTTAACTTACCTTTCTTTGT  | <i>clnR</i> (CD1617) intron retargeting                           |
| oMC1312 | CGCAAGTTTCTAATTTTCGGTTTGCGGTCGATAGAGGAAA<br>GTGTCT                | <i>clnR</i> (CD1617) intron retargeting                           |
| oMC1319 | AAAAGCTTTTGCACCCACGTCGATCGTGAAAAAATAGT<br>TTCAGTGCGCCCAGATAGGGT   | <i>clnA</i> (CD1618) intron retargeting                           |
| oMC1320 | CAGATTGTACAAATGTGGTGATAACAGATAAGTCGTTTC<br>ATATAACTTACCTTTCTTTGT  | <i>clnA</i> (CD1618) intron retargeting                           |
| oMC1321 | CGCAAGTTTCTAATTTTCGGTTATTTTTTCGATAGAGGAAAG<br>TGTCT               | <i>clnA</i> (CD1618) intron retargeting                           |
| oMC1383 | GTAGAAGGAGCAGAGGTTGTTT                                            | <i>grdA</i> (CD2352) qPCR                                         |
| oMC1384 | TCAGCAGCATCTTTAACTCTGT                                            | <i>grdA</i> (CD2352) qPCR                                         |
| oMC1393 | TGAAACCATGAATCTTAGAAGCATAAAC                                      | <i>vanZ</i> (CD1240) qPCR                                         |
| oMC1394 | CACATATATCCCAAATGGTACAAATATAGC                                    | <i>vanZ</i> (CD1240) qPCR                                         |
| oMC1410 | GTGGGATCCGCTAAAACCTTATTACAG                                       | <i>clnA</i> (CD1618) cloning                                      |
| oMC1416 | GTGGGATCCAGAAGAACAGTTTAA                                          | <i>PclnR</i> cloning                                              |
| oMC1427 | GTTTGGAAAGCCAATGCCAA                                              | check CD1616-1617 co-transcription                                |
| oMC1467 | TAGCAGAAGATGCGGAAGTTAAT                                           | <i>clnR</i> (CD1617) qPCR                                         |
| oMC1473 | GTTACAAATCTTCCTTTAGTTCTCTGAC                                      | <i>clnR</i> (CD1617) qPCR                                         |
| oMC1476 | GCGCATGCATTACTCAAAGATAGCT                                         | <i>clnRAB</i> cloning                                             |
| oMC1483 | CTGGGTCAACACCACCTATAG                                             | verify <i>clnA</i> (CD1618) disruption                            |
| oMC1493 | GTTAGAAGAGCAAATGAGATGATTAAGC                                      | <i>clnA</i> (CD1618) qPCR                                         |
| oMC1614 | GTGTACTCCACCAGCAAAGA                                              | <i>cstA</i> (CD2600) qPCR                                         |
| oMC1615 | GCAGGGTTAGGTCCGATATTT                                             | <i>cstA</i> (CD2600) qPCR                                         |
| oMC1684 | GCGGAATTCCTAAAAAGTAATTGACATATACTTTG                               | <i>PclnR</i> cloning                                              |
| oMC1689 | GTGGGATCCGGCGCCATGCATCACCATCACCATCACAT<br>GGAATGGGAACCTTGATAATAAC | <i>clnR</i> cloning with His-tag                                  |

|         |                                                                 |                                                    |
|---------|-----------------------------------------------------------------|----------------------------------------------------|
| oMC1690 | GTGGGCGCCGTTTCATGCCTCCTTATTA                                    | <i>PclnR</i> cloning                               |
| oMC1691 | FAM-CTAAAAAGTAATTGACATATACTTTG                                  | <i>PclnR</i> amplification with fluorescein        |
| oMC1692 | FAM-CATGCCTCCTTATTATATTATTG                                     | <i>PclnR</i> amplification with fluorescein        |
| oMC1700 | FAM-AGTTTGTGCAGTTTCTGAA                                         | <i>PiorA</i> amplification with fluorescein        |
| oMC1701 | FAM-ACTACAATTATTAATTCATAGATG                                    | <i>PiorA</i> amplification with fluorescein        |
| oMC1702 | FAM-CTCCAAAATACTACATAAAATAA                                     | <i>PmtIA</i> amplification with fluorescein        |
| oMC1703 | FAM-TATATCGATATGATCCCTTTTG                                      | <i>PmtIA</i> amplification with fluorescein        |
| oMC1704 | FAM-CAAATTAATAAAGCAATTTATA                                      | <i>PCD1606</i> amplification with fluorescein      |
| oMC1705 | FAM-CTAGTGTATTAATACGATAGTAC                                     | <i>PCD1606</i> amplification with fluorescein      |
| oMC1706 | FAM-TTGTTTAAGTATTAATTATGAGT                                     | <i>PcsfU</i> amplification with fluorescein        |
| oMC1707 | FAM-CGTCATTATATATAACGATTTATAC                                   | <i>PcsfU</i> amplification with fluorescein        |
| oMC1710 | FAM-ATGTTTCATCCCCTTTTTTAATC                                     | <i>Pcdd4/CD0668</i> amplification with fluorescein |
| oMC1711 | FAM-CACCCTCCTTTAGTATACC                                         | <i>Pcdd4/CD0668</i> amplification with fluorescein |
| oMC1712 | FAM-CAATATTAATTTATTTTTAAAAATAG                                  | <i>PtcdA</i> amplification with fluorescein        |
| oMC1713 | FAM-AGTATTATTTTTGATAATAAATC                                     | <i>PtcdA</i> amplification with fluorescein        |
| oMC1714 | FAM-CTTGTAATAAAAATAAGATTTAAGTG                                  | <i>PgrdE</i> amplification with fluorescein        |
| oMC1715 | FAM-CACCCTCCTGTTATTTAATTTG                                      | <i>PgrdE</i> amplification with fluorescein        |
| oMC1716 | CACCAATAATTTTATTATTTTGTATTATTG                                  | <i>Pspo0A</i> amplification                        |
| oMC1735 | AGAAAGATATGAAATACTACAATAGC                                      | <i>PvanZ</i> amplification with fluorescein        |
| oMC1736 | TAGATTTTCAATTTATTACCTCCTTAC                                     | <i>PvanZ</i> amplification with fluorescein        |
| oMC1737 | AGtGaattcgagctcggtaccgggggatccCAGAAGAACAGTTTAAAC<br>CTTTTAAAAG  | <i>PclnR</i> Gibson assembly                       |
| oMC1738 | CATTCATGTGATGGTGATGGTGATGCATggcgccTTCATG<br>CCTCCTTATTATATTAttg | <i>PclnR</i> Gibson assembly                       |
| oMC1739 | CTCCAAAATACTACATAAAATAA                                         | <i>PmtIA</i> amplification                         |
| oMC1740 | TATATCGATATGATCCCTTTTG                                          | <i>PmtIA</i> amplification                         |
| oMC1741 | CAAATTAATAAAGCAATTTATA                                          | <i>PCD1606</i> amplification                       |
| oMC1742 | CTAGTGTATTAATACGATAGTAC                                         | <i>PCD1606</i> amplification                       |
| oMC1743 | TTGTTTAAGTATTAATTATGAGT                                         | <i>PcsfU</i> amplification                         |
| oMC1744 | CGTCATTATATATAACGATTTATAC                                       | <i>PcsfU</i> amplification                         |
| oMC1745 | ATGTTTCATCCCCTTTTTTAATC                                         | <i>Pcdd4/CD0668</i> amplification                  |
| oMC1746 | CACCCTCCTTTAGTATACC                                             | <i>Pcdd4/CD0668</i> amplification                  |
| oMC1717 | TTGAGTACTATAGGTGACCCAATGA                                       | <i>mtIA (CD2334)</i> qPCR                          |
| oMC1718 | CCTCTTTGTCCTGCTATTGCTTTA                                        | <i>mtIA (CD2334)</i> qPCR                          |
| oMC1719 | GGTAAATGGTGGTATGGTACTTATT                                       | <i>iorA (CD2381)</i> qPCR                          |
| oMC1720 | AGCTTCTTGACTAGTTGATGGTTC                                        | <i>iorA (CD2381)</i> qPCR                          |
| oMC1754 | GGAATAATAGTTATGACTCATGGGAGTT                                    | <i>CD0284</i> qPCR                                 |
| oMC1755 | AGTTTAATTGCTGCTGTTCTTTCTG                                       | <i>CD0284</i> qPCR                                 |
| tcdRqF  | AGCAAGAAATAACTCAGTAGATGATT                                      | <i>tcdR (CD0659)</i> qPCR <sup>14</sup>            |
| tcdRqR  | TTATTAAATCTGTTTCTCCCTCTTCA                                      | <i>tcdR (CD0659)</i> qPCR <sup>14</sup>            |

<sup>a</sup> All sequences are listed 5' to 3'. Underlined sequences denote restriction sites or intron retarget sites.

<sup>b</sup> Abbreviations: qPCR, quantitative PCR
