# Supplementary material for: The C. difficile clnRAB operon initiates adaptations to the host environment in response to LL-37
Source: PubMed Central journal article supplement (PMC6117091; doi:10.1371/journal.ppat.1007153), 2018-08-20
Supplement: ppat.1007153.s022.pdf [file ppat.1007153.s022.pdf]

## Table S11. Plasmid construct details.

**pMC602:** The group II intron of pCE240 was targeted to *CD1617* at nucleotide 127 by splicing PCR using primers oMC1310, oMC1311, oMC1312, and EBSu as outlined in the TargeTron users manual (Sigma-Aldrich). The primers for intron retargeting were obtained by using the jpintronator algorithm. The group II *CD1617*-targeted intron was subcloned using the *BsrGI* and *HindIII* sites into pCE240.

**pMC616:** The 5.45 kb *SphI/SfoI* fragment from pMC602 was cloned as *SphI/SnaBI* into pMC123.

**pMC643:** The group II intron of pCE240 was targeted to *CD1618* at nucleotide 217 by splicing PCR using primers oMC1319, oMC1320, oMC1321, and EBSu as outlined in the TargeTron users manual (Sigma-Aldrich). The primers for intron retargeting were obtained by using the jpintronator algorithm. The group II *CD1618*-targeted intron was subcloned using the *BsrGI* and *HindIII* sites into pCE240.

**pMC645:** The 5.45 kb *SphI/SfoI* fragment from pMC645 was cloned as *SphI/SnaBI* into pMC123.

**pMC649:** The coding sequence of *CD1617-1619* and 300 bp upstream of *CD1617* was amplified using oMC1416 and oMC1476 and cloned into pSMB47 as *BamHI/SphI*.

**pMC687:** The coding sequence of *CD1234* was amplified with primers oMC1609 and oMC1610 and cloned into pMC211 as *BamHI/PstI*.

**pMC723:** The *clnRAB* operon was amplified with an N-terminal 6x His tag using primers oMC1689 and oMC1476 and cloned as *BamHI/SphI* into pMC123. Subsequently, *PclnR* (amplified using primers oMC1737 and oMC1738) was cloned by Gibson assembly as *BamHI/SfoI*.
